# Supplementary material for: The Discovery of phiAGATE, A Novel Phage Infecting Bacillus pumilus, Leads to New Insights into the Phylogeny of the Subfamily Spounavirinae
Source: PubMed Central journal article supplement (PMC3900605; doi:10.1371/journal.pone.0086632), 2014-01-23
Supplement: pone.0086632.s005.pdf [file pone.0086632.s005.pdf]

## A. Analyzed phages

| Phage name:                | Current NCBI Taxonomy | Seq. Lenght | Accesion                    | Reference |
|----------------------------|-----------------------|-------------|-----------------------------|-----------|
| Bacillus phage B4          | ...Myoviridae         | 162596      | <a href="#">NC_018863.1</a> | [d.s.]    |
| Bacillus phage B5S         | ...Myoviridae         | 162598      | <a href="#">JN797796.1</a>  | [d.s.]    |
| Bacillus phage BCP78       | ...Myoviridae         | 156176      | <a href="#">NC_018860.1</a> | [S1]      |
| Bacillus phage BCU4        | ...Myoviridae         | 154371      | <a href="#">JN797798.1</a>  | [d.s.]    |
| Bacillus phage BPS13       | ...Myoviridae         | 158305      | <a href="#">NC_018857.1</a> | [S2]      |
| Bacillus phage phiAGATE    | ...Caudovirales       | 147175      | <a href="#">NC_020081.1</a> | [d.s.]    |
| Bacillus phage W.Ph.       | ...Myoviridae         | 156897      | <a href="#">NC_016563.1</a> | [d.s.]    |
| Staphylococcus phage JD007 | ...Myoviridae         | 141836      | <a href="#">NC_019726.1</a> | [S3]      |

## B. Other Spounavirinae

| Phage name:                         | Current NCBI Taxonomy                                               | Seq. Lenght | Accession                   | Reference |
|-------------------------------------|---------------------------------------------------------------------|-------------|-----------------------------|-----------|
| <b>Bacillus phage Bastille</b>      | ...Spounavirinae; SPO1-like viruses; unclassified SPO1-like viruses | 153962      | <a href="#">NC_018856.1</a> | [d.s.]    |
| <b>Bacillus phage SPO1</b>          | ...Spounavirinae; SPO1-like viruses                                 | 132562      | <a href="#">NC_011421.1</a> | [d.s.]    |
| <b>Brochothrix phage A9</b>         | ...Spounavirinae; unclassified Spounavirinae                        | 127065      | <a href="#">NC_015253.1</a> | [S4]      |
| <b>Enterococcus phage phiEF24C</b>  | ...Spounavirinae; unassigned Spounavirinae                          | 142072      | <a href="#">NC_009904.1</a> | [S5]      |
| <b>Lactobacillus phage LP65</b>     | ...Spounavirinae; unassigned Spounavirinae                          | 131522      | <a href="#">NC_006565.1</a> | [S6]      |
| <b>Listeria phage A511</b>          | ...Spounavirinae; Twortlikevirus                                    | 137619      | <a href="#">NC_009811.2</a> | [S7]      |
| <b>Listeria phage P100</b>          | ...Spounavirinae; Twortlikevirus                                    | 131384      | <a href="#">DQ004855.1</a>  | [S8]      |
| <b>Staphylococcus phage 676Z</b>    | ...Spounavirinae; Twortlikevirus; unclassified Twortlikevirus       | 140115      | <a href="#">JX080302.1</a>  | [S9]      |
| <b>Staphylococcus phage A3R</b>     | ...Spounavirinae; Twortlikevirus; unclassified Twortlikevirus       | 132712      | <a href="#">JX080301.1</a>  | [S9]      |
| <b>Staphylococcus phage A5W</b>     | ...Spounavirinae; Twortlikevirus                                    | 137083      | <a href="#">EU418428.1</a>  | [d.s.]    |
| <b>Staphylococcus phage Fi200W</b>  | ...Spounavirinae; unclassified Spounavirinae                        | 140079      | <a href="#">JX080303.1</a>  | [S9]      |
| <b>Staphylococcus phage G1</b>      | ...Spounavirinae; Twortlikevirus                                    | 138715      | <a href="#">NC_007066.1</a> | [S10]     |
| <b>Staphylococcus phage GH15</b>    | ...Spounavirinae; Twortlikevirus; unclassified Twortlikevirus       | 139806      | <a href="#">NC_019448.1</a> | [S11]     |
| <b>Staphylococcus phage ISP</b>     | ...Spounavirinae; Twortlikevirus                                    | 138339      | <a href="#">FR852584.1</a>  | [S12]     |
| <b>Staphylococcus phage K</b>       | ...Spounavirinae; Twortlikevirus                                    | 127395      | <a href="#">NC_005880.1</a> | [S13]     |
| <b>Staphylococcus phage MSA6</b>    | ...Spounavirinae; unclassified Spounavirinae                        | 140194      | <a href="#">JX080304.1</a>  | [S9]      |
| <b>Staphylococcus phage P4W</b>     | ...Spounavirinae; unclassified Spounavirinae                        | 139173      | <a href="#">JX080305.1</a>  | [S9]      |
| <b>Staphylococcus phage Sb-1</b>    | ...Spounavirinae; SPO1-like viruses; unclassified SPO1-like viruses | 127188      | <a href="#">HQ163896.1</a>  | [S14]     |
| <b>Staphylococcus phage Staph1N</b> | ...Spounavirinae; unclassified Spounavirinae                        | 137192      | <a href="#">JX080300.1</a>  | [S9]      |
| <b>Staphylococcus phage Twort</b>   | ...Spounavirinae; Twortlikevirus                                    | 130706      | <a href="#">NC_007021.1</a> | [S10]     |

## C. Other Myoviridae

| Phage name:                      | Current NCBI Taxonomy           | Seq. Length | Accession                   | Reference   |
|----------------------------------|---------------------------------|-------------|-----------------------------|-------------|
| Acinetobacter phage 133          | ...Tevenvirinae; T4likevirus    | 159801      | <a href="#">NC_015250.1</a> | [S15]       |
| Acinetobacter phage Ac42         | ...Tevenvirinae; T4likevirus    | 167716      | <a href="#">NC_014660.1</a> | [S15]       |
| Acinetobacter phage Acj9         | ...Tevenvirinae; T4likevirus    | 169947      | <a href="#">NC_014663.1</a> | [S15]       |
| Acinetobacter phage Acj61        | ...Tevenvirinae; T4likevirus    | 164093      | <a href="#">NC_014661.1</a> | [S15]       |
| Acinetobacter phage ZZ1          | ...Myoviridae                   | 166682      | <a href="#">NC_018087.1</a> | [S16]       |
| Aeromonas phage 25               | ...Tevenvirinae; T4likevirus    | 161475      | <a href="#">NC_008208.1</a> | [S17]       |
| Aeromonas phage 31               | ...Tevenvirinae; T4likevirus    | 172963      | <a href="#">NC_007022.1</a> | [S17]       |
| Aeromonas phage 44RR2.8t         | ...Tevenvirinae; T4likevirus    | 173591      | <a href="#">NC_005135.1</a> | [S18]       |
| Aeromonas phage 65               | ...Tevenvirinae; T4likevirus    | 235229      | <a href="#">NC_015251.1</a> | [S15]       |
| Aeromonas phage Aeh1             | ...Tevenvirinae; T4likevirus    | 233234      | <a href="#">NC_005260.1</a> | [S18]       |
| Aeromonas phage Aes508           | ...Tevenvirinae; T4likevirus    | 160646      | <a href="#">NC_019543.1</a> | [d.s.]      |
| Aeromonas phage CC2              | ...Tevenvirinae; T4likevirus    | 231743      | <a href="#">NC_019538.1</a> | [S19]       |
| Aeromonas phage phiAS4           | ...Tevenvirinae; T4likevirus    | 163875      | <a href="#">NC_014635.1</a> | [S20]       |
| Aeromonas phage phiAS5           | ...Tevenvirinae; T4likevirus    | 225268      | <a href="#">NC_014636.1</a> | [S21]       |
| Aeromonas phage phiO18P          | ...Peduovirinae; Hpunalikevirus | 33985       | <a href="#">NC_009542.2</a> | [d.s.]      |
| Aeromonas phage vB_AsaM-56       | ...Myoviridae                   | 43551       | <a href="#">NC_019527.1</a> | [S22]       |
| Aggregatibacter phage S1249      | ...Myoviridae                   | 43970       | <a href="#">NC_013597.1</a> | [S23]       |
| Agrobacterium phage 7-7-1        | ...Myoviridae                   | 69391       | <a href="#">NC_019519.1</a> | [d.s.]      |
| Bacillus phage 0305phi8-36       | ...Myoviridae                   | 218948      | <a href="#">NC_009760.1</a> | [S24] [S25] |
| Bacillus phage BCD7              | ...Myoviridae                   | 93839       | <a href="#">NC_019515.1</a> | [d.s.]      |
| Bacillus phage SP10              | ...Myoviridae                   | 143986      | <a href="#">NC_019487.1</a> | [S26]       |
| Bdellovibrio phage phi1402       | ...Myoviridae                   | 23931       | <a href="#">NC_015721.1</a> | [S27]       |
| Bdellovibrio phage phi1422       | ...Myoviridae                   | 45354       | <a href="#">NC_019525.1</a> | [S22]       |
| Burkholderia phage Bcep1         | ...Myoviridae                   | 48177       | <a href="#">NC_005263.2</a> | [S28]       |
| Burkholderia phage Bcep43        | ...Myoviridae                   | 48024       | <a href="#">NC_005342.2</a> | [S28]       |
| Burkholderia phage Bcep781       | ...Myoviridae                   | 48247       | <a href="#">NC_004333.2</a> | [S28]       |
| Burkholderia phage BcepB1A       | ...Myoviridae                   | 47399       | <a href="#">NC_005886.2</a> | [S28]       |
| Burkholderia phage BcepF1        | ...Myoviridae                   | 72415       | <a href="#">NC_009015.1</a> | [d.s.]      |
| Burkholderia phage BcepMu        | ...Myoviridae                   | 36748       | <a href="#">NC_005882.1</a> | [S29]       |
| Burkholderia phage BcepNY3       | ...Myoviridae                   | 47382       | <a href="#">NC_009604.1</a> | [d.s.]      |
| Burkholderia phage KL3           | ...Peduovirinae; P2likeviruses  | 40555       | <a href="#">NC_015266.1</a> | [S30]       |
| Burkholderia phage KS5           | ...Peduovirinae; P2likeviruses  | 37236       | <a href="#">NC_015265.1</a> | [S30]       |
| Burkholderia phage KS10          | ...Myoviridae                   | 37635       | <a href="#">NC_011216.1</a> | [S31]       |
| Burkholderia phage KS14          | ...Peduovirinae; P2likeviruses  | 32317       | <a href="#">NC_015273.1</a> | [S30]       |
| Burkholderia phage phi52237      | ...Peduovirinae; P2likeviruses  | 37639       | <a href="#">NC_007145.2</a> | [d.s.]      |
| Burkholderia phage phiE12-2      | ...Peduovirinae; P2likeviruses  | 36690       | <a href="#">NC_009236.1</a> | [d.s.]      |
| Burkholderia phage phiE202       | ...Peduovirinae; P2likeviruses  | 35741       | <a href="#">NC_009234.1</a> | [d.s.]      |
| Burkholderia phage phiE255       | ...Myoviridae                   | 37446       | <a href="#">NC_009237.1</a> | [d.s.]      |
| Campylobacter phage CP21         | ...Myoviridae                   | 182833      | <a href="#">NC_019507.1</a> | [S32]       |
| Campylobacter phage CPX          | ...Myoviridae                   | 132662      | <a href="#">NC_016562.1</a> | [d.s.]      |
| Campylobacter phage NCTC12673    | ...Myoviridae                   | 135041      | <a href="#">NC_015464.1</a> | [S33]       |
| Clostridium phage c-st           | ...Myoviridae                   | 185683      | <a href="#">NC_007581.1</a> | [S34]       |
| Clostridium phage phiC2          | ...Myoviridae                   | 56538       | <a href="#">NC_009231.1</a> | [S35]       |
| Clostridium phage phiCD27        | ...Myoviridae                   | 50930       | <a href="#">NC_011398.1</a> | [S36]       |
| Clostridium phage phiCD119       | ...Myoviridae                   | 53325       | <a href="#">NC_007917.1</a> | [S37]       |
| Clostridium phage phiMMP02       | ...Myoviridae                   | 48396       | <a href="#">NC_019421.1</a> | [S38]       |
| Clostridium phage phiMMP04       | ...Myoviridae                   | 31674       | <a href="#">NC_019422.1</a> | [S38]       |
| Cronobacter phage CR3            | ...Myoviridae                   | 149273      | <a href="#">NC_017974.1</a> | [S39]       |
| Cronobacter phage ENT47670       | ...Myoviridae                   | 47611       | <a href="#">NC_019927.1</a> | [d.s.]      |
| Cronobacter phage vB_CsaM_GAP31  | ...Myoviridae                   | 147940      | <a href="#">NC_019400.1</a> | [S40]       |
| Cronobacter phage vB_CsaM_GAP32  | ...Myoviridae                   | 358663      | <a href="#">NC_019401.1</a> | [d.s.]      |
| Cronobacter phage vB_CsaM_GAP161 | ...Tevenvirinae; T4likevirus    | 178193      | <a href="#">NC_019398.1</a> | [S41]       |
| Cyanophage S-TIM5                | ...Myoviridae                   | 161440      | <a href="#">NC_019516.1</a> | [S42]       |
| Deftia phage phiW-14             | ...Myoviridae                   | 157486      | <a href="#">NC_013697.1</a> | [d.s.]      |
| Enterobacteria phage Bp7         | ...Tevenvirinae; T4likevirus    | 168066      | <a href="#">NC_019500.1</a> | [S43]       |
| Enterobacteria phage CC31        | ...Tevenvirinae; T4likevirus    | 165540      | <a href="#">NC_014662.1</a> | [S15]       |
| Enterobacteria phage HX01        | ...Tevenvirinae; T4likevirus    | 169158      | <a href="#">NC_018855.1</a> | [S44]       |
| Enterobacteria phage IME08       | ...Tevenvirinae; T4likevirus    | 172253      | <a href="#">NC_014260.1</a> | [S45] [S46] |
| Enterobacteria phage ime09       | ...Tevenvirinae; T4likevirus    | 166499      | <a href="#">NC_019503.1</a> | [d.s.]      |
| Enterobacteria phage JS10        | ...Tevenvirinae; T4likevirus    | 171451      | <a href="#">NC_012741.1</a> | [S47]       |
| Enterobacteria phage JS98        | ...Tevenvirinae; T4likevirus    | 170523      | <a href="#">NC_010105.1</a> | [S48] [S49] |
| Enterobacteria phage JSE         | ...Tevenvirinae; T4likevirus    | 166418      | <a href="#">NC_012740.1</a> | [S47]       |
| Enterobacteria phage Mu          | ...Muliikevirus                 | 36717       | <a href="#">NC_000929.1</a> | [S50]       |

## C. Other Myoviridae (continued)

| Phage name:                           | Current NCBI Taxonomy                              | Seq. Length | Accession                   | Reference                                 |
|---------------------------------------|----------------------------------------------------|-------------|-----------------------------|-------------------------------------------|
| Enterobacteria phage P1               | ...Punalikevirus                                   | 94800       | <a href="#">NC_005856.1</a> | [S51]                                     |
| Enterobacteria phage P2               | ...Peduovirinae; P2likeviruses                     | 33593       | <a href="#">NC_001895.1</a> | [S52] - [S74]                             |
| Enterobacteria phage P4               | ...Peduovirinae; P2likeviruses                     | 11624       | <a href="#">NC_001609.1</a> | [S58] [S75] [S76]                         |
| Enterobacteria phage Phi1             | ...Tevenvirinae; T4likevirus                       | 164270      | <a href="#">NC_009821.1</a> | [S77]                                     |
| Enterobacteria phage phiEcoM-GJ1      | ...Myoviridae                                      | 52975       | <a href="#">NC_010106.1</a> | [S78]                                     |
| Enterobacteria phage phiP27           | ...Myoviridae                                      | 42575       | <a href="#">NC_003356.1</a> | [S79]                                     |
| Enterobacteria phage PsP3             | ...Peduovirinae; P2likeviruses                     | 30636       | <a href="#">NC_005340.1</a> | [S80] [S81]                               |
| Enterobacteria phage RB14             | ...Tevenvirinae; T4likevirus                       | 165429      | <a href="#">NC_012638.1</a> | [d.s.]                                    |
| Enterobacteria phage RB16             | ...Tevenvirinae; T4likevirus                       | 176788      | <a href="#">NC_014467.1</a> | [S15]                                     |
| Enterobacteria phage RB32             | ...Tevenvirinae; T4likevirus                       | 165890      | <a href="#">NC_008515.1</a> | [d.s.]                                    |
| Enterobacteria phage RB43             | ...Tevenvirinae; T4likevirus                       | 180500      | <a href="#">NC_007023.1</a> | [d.s.]                                    |
| Enterobacteria phage RB49             | ...Tevenvirinae; T4likevirus                       | 164018      | <a href="#">NC_005066.1</a> | [S18] [S82] [S83] [S84] [S85] [S86]       |
| Enterobacteria phage RB51             | ...Tevenvirinae; T4likevirus                       | 168394      | <a href="#">NC_012635.1</a> | [d.s.]                                    |
| Enterobacteria phage RB69             | ...Tevenvirinae; T4likevirus                       | 167560      | <a href="#">NC_004928.1</a> | [S18] [S87] [S88] [S89]                   |
| Enterobacteria phage SfV              | ...Myoviridae                                      | 37074       | <a href="#">NC_003444.1</a> | [S90] [S91] [S92]                         |
| Enterobacteria phage T4               | ...Tevenvirinae; T4likevirus                       | 168903      | <a href="#">NC_000866.4</a> | [S93] - [S184]                            |
| Enterobacteria phage vB_EcoM_ACG-C40  | ...Tevenvirinae; T4likevirus                       | 167396      | <a href="#">NC_019399.1</a> | [d.s.]                                    |
| Enterobacteria phage vB_EcoM-FV3      | ...Myoviridae                                      | 136947      | <a href="#">NC_019517.1</a> | [S185]                                    |
| Enterobacteria phage vB_EcoM-VR7      | ...Tevenvirinae; T4likevirus                       | 169285      | <a href="#">NC_014792.1</a> | [S186] [S187]                             |
| Enterobacteria phage vB_KleM-RaK2     | ...Myoviridae                                      | 345809      | <a href="#">NC_019526.1</a> | [S188]                                    |
| Erwinia phage ENT90                   | ...Myoviridae                                      | 29564       | <a href="#">NC_019932.1</a> | [d.s.]                                    |
| Erwinia phage phiEa21-4               | ...Myoviridae                                      | 84576       | <a href="#">NC_011811.1</a> | [S189]                                    |
| Erwinia phage phiEa104                | ...Myoviridae                                      | 84565       | <a href="#">NC_015292.1</a> | [S190]                                    |
| Erwinia phage phiEt88                 | ...Myoviridae                                      | 47279       | <a href="#">NC_015295.1</a> | [S190]                                    |
| Erwinia phage vB_EamM-Y2              | ...Myoviridae                                      | 56621       | <a href="#">NC_019504.1</a> | [S191]                                    |
| Escherichia phage Cba120              | ...Myoviridae                                      | 157304      | <a href="#">NC_016570.1</a> | [d.s.]                                    |
| Escherichia phage D108                | ...Muliikevirus; unclassified Mu-like viruses      | 37235       | <a href="#">NC_013594.1</a> | [d.s.]                                    |
| Escherichia phage Phax1               | ...Myoviridae                                      | 156628      | <a href="#">NC_019452.1</a> | [d.s.]                                    |
| Escherichia phage wV7                 | ...Tevenvirinae; T4likevirus                       | 166452      | <a href="#">NC_019505.1</a> | [S192]                                    |
| Escherichia phage wV8                 | ...Myoviridae                                      | 88487       | <a href="#">NC_012749.1</a> | [S193]                                    |
| Haemophilus phage Aaphi23             | ...Myoviridae                                      | 43033       | <a href="#">NC_004827.1</a> | [S194]                                    |
| Haemophilus phage HP1                 | ...Peduovirinae; Hpunalikevirus                    | 32355       | <a href="#">NC_001697.1</a> | [S195] [S196] [S197] [S198] [S199] [S200] |
| Haemophilus phage HP2                 | ...Peduovirinae; Hpunalikevirus                    | 31508       | <a href="#">NC_003315.1</a> | [S201]                                    |
| Haemophilus phage SuMu                | ...Muliikevirus; unclassified Mu-like viruses      | 37151       | <a href="#">NC_019455.1</a> | [S202] [S203]                             |
| Halocynthia phage JM-2012             | ...Myoviridae                                      | 167292      | <a href="#">NC_017975.1</a> | [d.s.]                                    |
| Halomonas phage phiHAP-1              | ...Myoviridae                                      | 39245       | <a href="#">NC_010342.1</a> | [S204]                                    |
| Iodobacteriophage phiPLPE             | ...Myoviridae                                      | 47453       | <a href="#">NC_011142.1</a> | [S205]                                    |
| Klebsiella phage KP15                 | ...Tevenvirinae; T4likevirus                       | 174436      | <a href="#">NC_014036.1</a> | [d.s.]                                    |
| Lactobacillus phage KC5a              | ...Myoviridae                                      | 38239       | <a href="#">NC_007924.1</a> | [d.s.]                                    |
| Lactobacillus phage Lb338-1           | ...Myoviridae                                      | 142111      | <a href="#">NC_012530.1</a> | [S206]                                    |
| Mannheimia phage phiMHaA1             | ...Peduovirinae; P2likeviruses                     | 34525       | <a href="#">NC_008201.1</a> | [S207]                                    |
| Microcystis aeruginosa phage Ma-LMM01 | ...Myoviridae                                      | 162109      | <a href="#">NC_008562.1</a> | [S208]                                    |
| Mycobacterium phage Bxz1              | ...I3likevirus; unclassified I3-like viruses       | 156102      | <a href="#">NC_004687.1</a> | [S209]                                    |
| Mycobacterium phage Cali              | ...I3likevirus; unclassified I3-like viruses       | 155372      | <a href="#">NC_011271.1</a> | [d.s.]                                    |
| Mycobacterium phage Catera            | ...I3likevirus; unclassified I3-like viruses       | 153766      | <a href="#">NC_008207.1</a> | [S210]                                    |
| Mycobacterium phage ET08              | ...I3likevirus; unclassified I3-like viruses       | 155445      | <a href="#">NC_013650.1</a> | [S211]                                    |
| Mycobacterium phage Myrna             | ...Myoviridae                                      | 164602      | <a href="#">NC_011273.1</a> | [d.s.]                                    |
| Mycobacterium phage Rizal             | ...I3likevirus; unclassified I3-like viruses       | 153894      | <a href="#">NC_011272.1</a> | [d.s.]                                    |
| Mycobacterium phage ScottMcG          | ...I3likevirus; unclassified I3-like viruses       | 154017      | <a href="#">NC_011269.1</a> | [d.s.]                                    |
| Mycobacterium phage Spud              | ...I3likevirus; unclassified I3-like viruses       | 154906      | <a href="#">NC_011270.1</a> | [d.s.]                                    |
| Natrialba phage PhiCh1                | ...Myoviridae                                      | 58498       | <a href="#">NC_004084.1</a> | [S212] [S213] [S214]                      |
| Pasteurella phage F108                | ...Peduovirinae; Hpunalikevirus                    | 30505       | <a href="#">NC_008193.1</a> | [S215]                                    |
| Pectobacterium phage ZF40             | ...Myoviridae                                      | 48454       | <a href="#">NC_019522.1</a> | [S22]                                     |
| Prochlorococcus phage P-HM1           | ...Myoviridae                                      | 181044      | <a href="#">NC_015280.1</a> | [S216]                                    |
| Prochlorococcus phage P-HM2           | ...Myoviridae                                      | 183806      | <a href="#">NC_015284.1</a> | [S216]                                    |
| Prochlorococcus phage P-RSM4          | ...Myoviridae                                      | 176428      | <a href="#">NC_015283.1</a> | [S216]                                    |
| Prochlorococcus phage P-SSM2          | ...Tevenvirinae; T4likevirus                       | 252401      | <a href="#">NC_006883.2</a> | [S216] [S217]                             |
| Prochlorococcus phage P-SSM4          | ...Tevenvirinae; T4likevirus                       | 178249      | <a href="#">NC_006884.2</a> | [S216] [S217]                             |
| Prochlorococcus phage P-SSM7          | ...Myoviridae                                      | 182180      | <a href="#">NC_015290.1</a> | [S216]                                    |
| Pseudomonas phage 14-1                | ...Myoviridae                                      | 66235       | <a href="#">NC_011703.1</a> | [S218]                                    |
| Pseudomonas phage 201phi2-1           | ...Phikzlikevirus; unclassified phiKZ-like viruses | 316674      | <a href="#">NC_010821.1</a> | [S219] [S220]                             |
| Pseudomonas phage EL                  | ...Phikzlikevirus                                  | 211215      | <a href="#">NC_007623.1</a> | [S221] [S222] [S223] [S224]               |
| Pseudomonas phage F8                  | ...Myoviridae                                      | 66015       | <a href="#">NC_007810.1</a> | [S225]                                    |

C. Other *Myoviridae* (continued)

| Phage name:                                | Current NCBI Taxonomy              | Seq. Length | Accession                   | Reference            |
|--------------------------------------------|------------------------------------|-------------|-----------------------------|----------------------|
| <b>Pseudomonas phage JG004</b>             | ...Myoviridae                      | 93017       | <a href="#">NC_019450.1</a> | [S226]               |
| <b>Pseudomonas phage JG024</b>             | ...Myoviridae                      | 66275       | <a href="#">NC_017674.1</a> | [S227]               |
| <b>Pseudomonas phage KPP10</b>             | ...Myoviridae                      | 88322       | <a href="#">NC_015272.1</a> | [S228]               |
| <b>Pseudomonas phage KPP12</b>             | ...Myoviridae                      | 64144       | <a href="#">NC_019935.1</a> | [S229]               |
| <b>Pseudomonas phage LBL3</b>              | ...Myoviridae                      | 64427       | <a href="#">NC_011165.1</a> | [S218] [S230]        |
| <b>Pseudomonas phage LMA2</b>              | ...Myoviridae                      | 66530       | <a href="#">NC_011166.1</a> | [S218] [S230]        |
| <b>Pseudomonas phage Lu11</b>              | ...Myoviridae                      | 280538      | <a href="#">NC_017972.1</a> | [S231]               |
| <b>Pseudomonas phage NH-4</b>              | ...Myoviridae                      | 66116       | <a href="#">NC_019451.1</a> | [S232]               |
| <b>Pseudomonas phage OBP</b>               | ...Myoviridae                      | 284757      | <a href="#">NC_016571.1</a> | [S233]               |
| <b>Pseudomonas phage PAK_P1</b>            | ...Myoviridae                      | 93398       | <a href="#">NC_015294.1</a> | [S234]               |
| <b>Pseudomonas phage PaP1</b>              | ...Myoviridae                      | 91715       | <a href="#">NC_019913.1</a> | [d.s.]               |
| <b>Pseudomonas phage PB1</b>               | ...Myoviridae                      | 65764       | <a href="#">NC_011810.1</a> | [S218]               |
| <b>Pseudomonas phage phiCTX</b>            | ...Peduovirinae; P2likeviruses     | 35580       | <a href="#">NC_003278.1</a> | [S235] [S236] [S237] |
| <b>Pseudomonas phage phiKZ</b>             | ...Phikzlikevirus                  | 280334      | <a href="#">NC_004629.1</a> | [S238] [S239]        |
| <b>Pseudomonas phage SN</b>                | ...Myoviridae                      | 66390       | <a href="#">NC_011756.1</a> | [S218]               |
| <b>Pseudomonas phage vB_PaeM_C2-10_Ab1</b> | ...Myoviridae                      | 92777       | <a href="#">NC_019918.1</a> | [d.s.]               |
| <b>Ralstonia phage RSA1</b>                | ...Peduovirinae; P2likeviruses     | 38760       | <a href="#">NC_009382.1</a> | [S240]               |
| <b>Ralstonia phage RSL1</b>                | ...Myoviridae                      | 231255      | <a href="#">NC_010811.2</a> | [S241]               |
| <b>Rhodothermus phage RM378</b>            | ...Myoviridae                      | 129908      | <a href="#">NC_004735.1</a> | [S242]               |
| <b>Salmonella phage FelixO1</b>            | ...Myoviridae                      | 86155       | <a href="#">NC_005282.1</a> | [d.s.]               |
| <b>Salmonella phage Fels-2</b>             | ...Peduovirinae; P2likeviruses     | 33693       | <a href="#">NC_010463.1</a> | [S243]               |
| <b>Salmonella phage PhiSH19</b>            | ...Myoviridae                      | 157785      | <a href="#">NC_019530.1</a> | [S244]               |
| <b>Salmonella phage PVP-SE1</b>            | ...Myoviridae                      | 145964      | <a href="#">NC_016071.1</a> | [S245]               |
| <b>Salmonella phage RE-2010</b>            | ...Myoviridae                      | 34117       | <a href="#">NC_019488.1</a> | [S246]               |
| <b>Salmonella phage SFP10</b>              | ...Myoviridae                      | 157950      | <a href="#">NC_016073.1</a> | [S247]               |
| <b>Salmonella phage SKML-39</b>            | ...Myoviridae                      | 159624      | <a href="#">NC_019910.1</a> | [d.s.]               |
| <b>Salmonella phage Vil</b>                | ...Myoviridae                      | 157061      | <a href="#">NC_015296.1</a> | [S248]               |
| <b>Shigella phage Ag3</b>                  | ...Myoviridae                      | 158006      | <a href="#">NC_013693.1</a> | [d.s.]               |
| <b>Shigella phage Shf12</b>                | ...Tevenvirinae; T4likevirus       | 165919      | <a href="#">NC_015457.1</a> | [d.s.]               |
| <b>Shigella phage SP18</b>                 | ...Tevenvirinae; T4likevirus       | 170605      | <a href="#">NC_014595.1</a> | [S249]               |
| <b>Sphingomonas phage PAU</b>              | ...Myoviridae                      | 219372      | <a href="#">NC_019521.1</a> | [d.s.]               |
| <b>Streptococcus phage EJ-1</b>            | ...Myoviridae                      | 42935       | <a href="#">NC_005294.1</a> | [S250] [S251]        |
| <b>Synechococcus phage metaG-MbCM1</b>     | ...Tevenvirinae; T4likevirus       | 172879      | <a href="#">NC_019443.1</a> | [d.s.]               |
| <b>Synechococcus phage S-CRM01</b>         | ...Myoviridae                      | 178563      | <a href="#">NC_015569.1</a> | [S252]               |
| <b>Synechococcus phage S-MbCM6</b>         | ...Tevenvirinae; T4likevirus       | 176043      | <a href="#">NC_019444.1</a> | [d.s.]               |
| <b>Synechococcus phage S-PM2</b>           | ...Tevenvirinae; T4likevirus       | 196280      | <a href="#">NC_006820.1</a> | [S253] [S254]        |
| <b>Synechococcus phage S-RSM4</b>          | ...Tevenvirinae; T4likevirus       | 194454      | <a href="#">NC_013085.1</a> | [S255]               |
| <b>Synechococcus phage S-ShM2</b>          | ...Myoviridae                      | 179563      | <a href="#">NC_015281.1</a> | [S216]               |
| <b>Synechococcus phage S-SM1</b>           | ...Myoviridae                      | 174079      | <a href="#">NC_015282.1</a> | [S216]               |
| <b>Synechococcus phage S-SM2</b>           | ...Myoviridae                      | 190789      | <a href="#">NC_015279.1</a> | [S216]               |
| <b>Synechococcus phage S-SSM5</b>          | ...Myoviridae                      | 176184      | <a href="#">NC_015289.1</a> | [S216]               |
| <b>Synechococcus phage S-SSM7</b>          | ...Myoviridae                      | 232878      | <a href="#">NC_015287.1</a> | [S216]               |
| <b>Synechococcus phage syn9</b>            | ...Tevenvirinae; T4likevirus       | 177300      | <a href="#">NC_008296.2</a> | [S256]               |
| <b>Synechococcus phage Syn19</b>           | ...Myoviridae                      | 175230      | <a href="#">NC_015286.1</a> | [S216]               |
| <b>Thermus phage phiYS40</b>               | ...Myoviridae                      | 152372      | <a href="#">NC_008584.1</a> | [S257]               |
| <b>Thermus phage TMA</b>                   | ...Myoviridae                      | 151483      | <a href="#">NC_015937.1</a> | [S258]               |
| <b>Vibrio phage CP-T1</b>                  | ...Myoviridae                      | 44492       | <a href="#">NC_019457.1</a> | [S22]                |
| <b>Vibrio phage ICP1</b>                   | ...Myoviridae                      | 125956      | <a href="#">NC_015157.1</a> | [S259]               |
| <b>Vibrio phage K139</b>                   | ...Peduovirinae; Hpunalikevirus    | 33106       | <a href="#">NC_003313.1</a> | [S260] [S261] [S262] |
| <b>Vibrio phage kappa</b>                  | ...Peduovirinae; Hpunalikevirus    | 33134       | <a href="#">NC_010275.1</a> | [d.s.]               |
| <b>Vibrio phage KVP40</b>                  | ...Tevenvirinae; Schizot4likevirus | 244834      | <a href="#">NC_005083.2</a> | [S263]               |
| <b>Vibrio phage vB_VchM-138</b>            | ...Myoviridae                      | 44485       | <a href="#">NC_019518.1</a> | [S22]                |
| <b>Vibrio phage vB_VpaM_MAR</b>            | ...Myoviridae                      | 41351       | <a href="#">NC_019722.1</a> | [S264]               |
| <b>Vibrio phage vB_VpaS_MAR10</b>          | ...Myoviridae                      | 78751       | <a href="#">NC_019713.1</a> | [S265]               |
| <b>Vibrio phage VHML</b>                   | ...VHML-like phages                | 43198       | <a href="#">NC_004456.1</a> | [S266]               |
| <b>Vibrio phage VP882</b>                  | ...Myoviridae                      | 38197       | <a href="#">NC_009016.1</a> | [S267]               |
| <b>Xanthomonas phage OP2</b>               | ...Myoviridae                      | 46643       | <a href="#">NC_007710.1</a> | [S268]               |
| <b>Xanthomonas phage vB_XveM_DIBBI</b>     | ...Myoviridae                      | 49981       | <a href="#">NC_017981.1</a> | [d.s.]               |
| <b>Yersinia phage L-413C</b>               | ...Peduovirinae; P2likeviruses     | 30728       | <a href="#">NC_004745.1</a> | [d.s.]               |
| <b>Yersinia phage phiR1-37</b>             | ...Myoviridae                      | 262391      | <a href="#">NC_016163.1</a> | [S269]               |
| <b>Yersinia phage phiR1-RT</b>             | ...Myoviridae                      | 168809      | <a href="#">NC_019909.1</a> | [d.s.]               |

## D. References

- S1. Lee JH, Shin H, Son B, Ryu S (2012) Complete Genome Sequence of Bacillus cereus Bacteriophage BCP78J Virol 86 (1):637-638
- S2. Park J, Yun J, Lim JA, Kang DH, Ryu S (2012) Characterization of an endolysin, LysBPS13, from a Bacillus cereus bacteriophage FEMS Microbiol Lett 332 (1):76-83
- S3. Cui Z, Song Z, Wang Y, Zeng L, Shen W, Wang Z, Li Q, He P, Qin J, Guo X (2012) Complete Genome Sequence of Wide-Host-Range Staphylococcus aureus Phage JD007J. Virol. 86 (24):13880-13881
- S4. Kilcher S, Loessner MJ, Klumpp J (2010) Brochothrix thermosphacta bacteriophages feature heterogeneous and highly mosaic genomes and utilize unique prophage insertion sites. J. Bacteriol. 192 (20):5441-5453
- S5. Uchiyama J, Rashel M, Takemura I, Wakiguchi H, Matsuzaki S (2008) In silico and in vivo evaluation of bacteriophage phiEF24C, a candidate for treatment of Enterococcus faecalis infections. Appl. Environ. Microbiol. 74 (13):4149-4163
- S6. Chibani-Chennoufi S, Dillmann ML, Marvin-Guy L, Rami-Shojaei S, Br (2004) Lactobacillus plantarum Bacteriophage LP65: a New Member of the SPO1-Like Genus of the Family Myoviridae. J. Bacteriol. 186 (21):7069-7083
- S7. Klumpp J, Dorscht J, Lurz R, Biemann R, Wieland M, Zimmer M, Calendar R, Loessner MJ (2008) The terminally redundant, nonpermuted genome of Listeria bacteriophage A511: a model for the SPO1-like myoviruses of gram-positive bacteria. J. Bacteriol. 190 (17):5753-5765
- S8. Carlton RM, Noordman WH, Biswas B, de Meester ED, Loessner MJ (2005) Bacteriophage P100 for control of Listeria monocytogenes in foods: genome sequence, bioinformatic analyses, oral toxicity study, and application. Regul. Toxicol. Pharmacol. 43 (3):301-312
- S9. Lobočka M, Hejnowicz MS, Dabrowski K, Gozdek A, Kosakowski J, Witkowska M, Ulatowska MI, Weber-Dabrowska B, Kwiatek M, Parasion S, Gawor J, Kosowska H, Glowacka A (2012) Genomics of Staphylococcal T4-like Phages - Potential Therapeutics of the Post-Antibiotic Era. Adv. Virus Res. 83:143-216
- S10. Kwan T, Liu J, DuBow M, Gros P, Pelletier J (2005) The complete genomes and proteomes of 27 Staphylococcus aureus bacteriophages. Proc. Natl. Acad. Sci. U.S.A. 102 (14):5174-5179
- S11. Gu J, Liu X, Lu R, Li Y, Song J, Lei L, Sun C, Feng X, Du C, Yu H, Yang Y, Han W (2012) Complete Genome Sequence of Staphylococcus aureus Bacteriophage GH15J. Virol. 86 (16):8914-8915
- S12. Vandersteegen K, Mattheus W, Ceysens PJ, Bilocq F, De Vos D, Pirnay JP, Noben JP, Merabishvili M, Lipinska U, Hermans K, Lavigne R (2011) Microbiological and Molecular Assessment of Bacteriophage ISP for the Control of Staphylococcus aureus. PLoS ONE 6 (9):E24418
- S13. O'Flaherty S, Coffey A, Edwards R, Meaney W, Fitzgerald GF, Ross RP (2004) Genome of staphylococcal phage K: a new lineage of Myoviridae infecting gram-positive bacteria with a low G+C content. J. Bacteriol. 186 (9):2862-2871
- S14. Leila K, Nana B, Tamila M, Ekaterine T, Natia S, Tamila P, Revaz A, Temur T, Elizabeth K, Christine R, Mzia K (2011) Evaluation of lytic activity of staphylococcal bacteriophage Sb-1 against freshly isolated clinical pathogens. Microb Biotechnol. 4(5):643-50
- S15. Petrov VM, Ratnayaka S, Nolan JM, Miller ES, Karam JD (2010) Genomes of the T4-related bacteriophages as windows on microbial genome evolution. Virol. J. 7 (1):292
- S16. Jin J, Li ZJ, Wang SW, Wang SM, Huang DH, Li YH, Ma YY, Wang J, Liu F, Chen XD, Li GX, Wang XT, Wang ZQ, Zhao GQ (2012) Isolation and characterization of ZZ1, a novel lytic phage that infects Acinetobacter baumannii clinical isolates. BMC Microbiol. 12 (1):156
- S17. Petrov VM, Nolan JM, Bertrand C, Levy D, Desplats C, Krisch HM, Karam JD (2006) Plasticity of the gene functions for DNA replication in the T4-like phages. J. Mol. Biol. 361 (1):46-68
- S18. Tetart F, Desplats C, Kutateladze M, Monod C, Ackermann HW, Krisch HM (2001) Phylogeny of the major head and tail genes of the wide-ranging T4-type bacteriophages. J. Bacteriol. 183 (1):358-366
- S19. Shen CJ, Liu YJ, Lu CP (2012) Complete Genome Sequence of Aeromonas hydrophila Phage CC2. J. Virol. 86 (19):10900
- S20. Kim JH, Son JS, Choi YJ, Choresca CH, Shin SP, Han JE, Jun JW, Park SC (2012) Complete genomic sequence of a T4-like bacteriophage, phiAS4, infecting Aeromonas salmonicida subsp. salmonicida. Arch. Virol. 157 (2):391-395
- S21. Kim JH, Son JS, Choi YJ, Choresca CH, Jr, Shin SP, Han JE, Jun JW, Park SC (2012) Complete genome sequence and characterization of a broad-host range T4-like bacteriophage phiAS5 infecting Aeromonas salmonicida subsp. salmonicida. Vet. Microbiol. 157 (1-2):164-171
- S22. Comeau AM, Tremblay D, Moineau S, Rattei T, Kushkina AI, Tovkach FI, Krisch HM, Ackermann HW (2012) Phage morphology recapitulates phylogeny: the comparative genomics of a new group of myoviruses. PLoS ONE 7 (7):E40102
- S23. Chen C, Kittichotirat W, Si Y, Bumgarner R (2009) Genome sequence of Aggregatibacter actinomycetemcomitans serotype c strain D11S-1. J. Bacteriol. 191 (23):7378-7379
- S24. Hardies SC, Thomas JA, Serwer P (2007) Comparative genomics of Bacillus thuringiensis phage 0305phi8-36: defining patterns of descent in a novel ancient phage lineage. Virol. J. 4 97
- S25. Thomas JA, Hardies SC, Rolando M, Hayes SJ, Lieman K, Carroll CA, Weintraub ST, Serwer P (2007) Complete genomic sequence and mass spectrometric analysis of highly diverse, atypical Bacillus thuringiensis phage 0305phi8-36. Virology 368 (2):405-421
- S26. Yee LM, Matsumoto T, Yano K, Matsuoka S, Sadaie Y, Yoshikawa H, Asai K (2011) The Genome of Bacillus subtilis Phage SP10: A Comparative Analysis with Phage SPO1. Biosci. Biotechnol. Biochem. 75 (5):944-952
- S27. Ackermann H-W, Krisch HM, Comeau AM (2011) Morphology and genome sequence of phage phi1402: A dwarf myovirus of the predatory bacterium Bdellovibrio bacteriovorus. Bacteriophage 1 (3):05-sty
- S28. Summer EJ, Gonzalez CF, Bomer M, Carlile T, Embry A, Kucherka AM, Lee J, Mebane L, Morrison WC, Mark L, King MD, LiPuma JJ, Vidaver AK, Young R (2006) Divergence and mosaicism among virulent soil phages of the Burkholderia cepacia complex. J. Bacteriol. 188 (1):255-268
- S29. Summer EJ, Gonzalez CF, Carlisle T, Mebane LM, Cass AM, Savva CG, LiPuma J, Young R (2004) Burkholderia cenocepacia phage BcepMu and a family of Mu-like phages encoding potential pathogenesis factors. J. Mol. Biol. 340 (1):49-65
- S30. Lynch KH, Stothard P, Dennis JJ (2010) Genomic analysis and relatedness of P2-like phages of the Burkholderia cepacia complex. BMC Genomics 11 (1):599
- S31. Goudie AD, Lynch KH, Seed KD, Stothard P, Shrivastava S, Wishart DS, Dennis JJ (2008) Genomic sequence and activity of KS10, a transposable phage of the Burkholderia cepacia complex. BMC Genomics 9 615
- S32. Hammerl JA, Jackel C, Reetz J, Hertwig S (2012) The Complete Genome Sequence of Bacteriophage CP21 Reveals Modular Shuffling in Campylobacter Group II Phages. J. Virol. 86 (16):8896
- S33. Kropinski AM, Arutyunov D, Foss M, Cunningham A, Ding W, Singh A, Pavlov AR, Henry M, Evoy S, Kelly J, Szymanski CM (2011) Genome and Proteome of Campylobacter jejuni Bacteriophage NCTC 12673. Appl. Environ. Microbiol. 77 (23):8265-8271
- S34. Sakaguchi Y, Hayashi T, Kurokawa K, Nakayama K, Oshima K, Fujinaga Y, Ohnishi M, Ohtsubo E, Hattori M, Oguma K (2005) The genome sequence of Clostridium botulinum type C neurotoxin-converting phage and the molecular mechanisms of unstable lysogeny. Proc. Natl. Acad. Sci. U.S.A. 102 (48):17472-17477
- S35. Goh S, Ong PF, Song KP, Riley TV, Chang BJ (2007) The complete genome sequence of Clostridium difficile phage {phi}C2 and comparisons to {phi}CD119 and inducible prophages of CD630. Microbiology (Reading, Engl.) 153 (PT 3), 676-685
- S36. Mayer MJ, Narbad A, Gasson MJ (2008) Molecular characterization of a Clostridium difficile bacteriophage and its cloned biologically active endolysin. J. Bacteriol. 190 (20):6734-6740
- S37. Govind R, Fralick JA, Rolfe RD (2006) Genomic Organization and Molecular Characterization of Clostridium difficile Bacteriophage {Phi}CD119. J. Bacteriol. 188 (7):2568-2577
- S38. Meessen-Pinard M, Sekulovic O, Fortier LC (2012) Evidence of In Vivo Prophage Induction during Clostridium difficile Infection. Appl. Environ. Microbiol. 78 (21):7662-7670
- S39. Shin H, Lee JH, Kim Y, Ryu S (2012) Complete Genome Sequence of Cronobacter sakazakii Bacteriophage CR3. J. Virol. 86 (11):6367-6368
- S40. Abbasifar R, Kropinski AM, Sabour PM, Ackermann HW, Alanis, Villa A, Abbasifar A, Griffiths MW (2012) Genome Sequence of Cronobacter sakazakii Myovirus vB\_CsaM\_GAP31. J. Virol. 86 (24):13830-13831
- S41. Abbasifar R, Kropinski AM, Sabour PM, Ackermann HW, Lingohr EJ, Griffiths MW (2012) Complete Genome Sequence of Cronobacter sakazakii Bacteriophage vB\_CsaM\_GAP161. J. Virol. 86 (24):13806-13807
- S42. Sabehi G, Shaulov L, Silver DH, Yanai I, Harel A, Lindell D (2012) A novel lineage of myoviruses infecting cyanobacteria is widespread in the oceans. Proc. Natl. Acad. Sci. U.S.A. 109 (6):2037-2042
- S43. Liu X, Ren H, Liu W, Wen J, Zou L, Liu C (2010) Morphological observation on lytic cycle of bacteriophage Bp7. Dian Zi Xian Wei Xue Bao 29 (2):182-184
- S44. Tang F, Li Y, Zhang W, Lu C (2012) Complete Genome Sequence of T4-Like Escherichia coli Bacteriophage HX01. J. Virol. 86 (24):13871
- S45. Jiang H, Jiang X, Wang S, Li C, Chen B, An X, Mi Z, Chen J, Tong Y (2011) The complete genome sequence of a novel T4-like bacteriophage, IME08. Arch. Virol. 156 (8):1489-1492
- S46. Jiang X, Jiang H, Li C, Wang S, Mi Z, An X, Chen J, Tong Y (2011) Sequence characteristics of T4-like bacteriophage IME08 genome termini revealed by high throughput sequencing. Virol. J. 8 194
- S47. Denou E, Bruttin A, Barretto C, Ngom-Bru C, Brussow H, Zuber S (2009) T4 phages against Escherichia coli diarrhea: potential and problems. Virology 388 (1):21-30
- S48. Chibani-Chennoufi S, Canchaya C, Bruttin A, Brussow H (2004) Comparative genomics of the T4-Like Escherichia coli phage JS98: implications for the evolution of T4 phages. J. Bacteriol. 186 (24):8276-8286
- S49. Zuber S, Ngom-Bru C, Barretto C, Bruttin A, Brussow H, Denou E (2007) Genome analysis of phage JS98 defines a fourth major subgroup of T4-like phages in Escherichia coli. J. Bacteriol. 189 (22):8206-8214
- S50. Morgan GJ, Hatfull GF, Casjens S, Hendrix RW (2002) Bacteriophage Mu genome sequence: analysis and comparison with Mu-like prophages in Haemophilus, Neisseria and Deinococcus. J. Mol. Biol. 317 (3):337-359
- S51. Lobočka MB, Rose DJ, Plunkett G, III, Rusin M, Samojedny A, Lehnerr H, Yarmolinsky MB, Blattner FR (2004) Genome of bacteriophage P1. J. Bacteriol. 186 (21):7032-7068
- S52. Birkeland NK, Lindquist BH (1986) Coliphage P2 late control gene ogr. DNA sequence and product identification. J. Mol. Biol. 188 (3):487-490
- S53. Calendar R, Yu S, Myung H, Barreiro V, Odegrip R, Bertani LE, Carlson K, Davenport L, Mosig G, Christie GE, Haggard-Ljungquist E (1998) The lysogenic conversion genes of coliphage P2 have unusually high AT content (in) Syvanen, M. and Kado, C. (Eds.); HORIZONTAL GENE TRANSFER; Chapman and Hall London
- S54. Christie GE, Calendar R (1985) Bacteriophage P2 late promoters. II. Comparison of the four late promoter sequences. J. Mol. Biol. 181 (3):373-382

## D. References (continued)

- S55. Christie GE, Calendar R (1983) Bacteriophage P2 late promoters. Transcription initiation sites for two late mRNAs J. Mol. Biol. 167 (4):773-790
- S56. Christie GE, Haggard-Ljungquist E, Feiwell R, Calendar R (1986) Regulation of bacteriophage P2 late-gene expression: the ogr gene Proc. Natl. Acad. Sci. U.S.A. 83 (10):3238-3242
- S57. Christie GE, Temple LM, Bartlett BA, Goodwin TS (2002) Programmed translational frameshift in the bacteriophage P2 FETUD tail gene operon J. Bacteriol. 184 (23):6522-6531
- S58. Haggard-Ljungquist E, Jacobsen E, Rishovd S, Six WS, Nilssen O, Sunshine MG, Lindqvist BH, Kim KJ, Barreiro V, Koonin EV, Calendar R (1995) Bacteriophage P2: genes involved in baseplate assembly Virology 213 (1):109-121
- S59. Haggard-Ljungquist E, Barreiro V, Calendar R, Kurnit DM, Cheng H (1989) The P2 phage old gene: sequence, transcription and translational control Gene 85 (1):25-33
- S60. Haggard-Ljungquist E, Halling C, Calendar R (1992) DNA sequences of the tail fiber genes of bacteriophage P2: evidence for horizontal transfer of tail fiber genes among unrelated bacteriophages J. Bacteriol. 174 (5):1462-1477
- S61. Haggard-Ljungquist E, Kockum K, Bertani LE (1987) DNA sequences of bacteriophage P2 early genes cox and B and their regulatory sites Mol. Gen. Genet. 208 (1-2):52-56
- S62. Linderoth NA, Julien B, Flick KE, Calendar R, Christie GE (1994) Molecular cloning and characterization of bacteriophage P2 genes R and S involved in tail completion Virology 200 (2):347-359
- S63. Linderoth NA, Ziermann R, Haggard-Ljungquist E, Christie GE, Calendar R (1991) Nucleotide sequence of the DNA packaging and capsid synthesis genes of bacteriophage P2 Nucleic Acids Res. 19 (25):7207-7214
- S64. Lindqvist BH (1981) Recombination between satellite phage P4 and its helper P2. I. In vivo and in vitro construction of P4: :P2 hybrid satellite phage Gene 14 (4):231-241
- S65. Liu Y, Saha S, Haggard-Ljungquist E (1993) Studies of bacteriophage P2 DNA replication. The DNA sequence of the cis-acting gene A and ori region and construction of a P2 mini-chromosome J. Mol. Biol. 231 (2):361-374
- S66. Ljungquist E, Kockum K, Bertani LE (1984) DNA sequences of the repressor gene and operator region of bacteriophage P2 Proc. Natl. Acad. Sci. U.S.A. 81 (13):3988-3992
- S67. Murray K, Isaksson-Forsen AG, Challberg M, Englund PT (1977) Symmetrical nucleotide sequences in the recognition sites for the ter function of bacteriophages P2, 299 and 186 J. Mol. Biol. 112 (3):471-489
- S68. Murray K, Murray NE (1973) Terminal nucleotide sequences of DNA from temperate coliphages Nature New Biol. 243 (126):134-139
- S69. Saha S, Haggard-Ljungquist E, Nordstrom K (1987) The cox protein of bacteriophage P2 inhibits the formation of the repressor protein and autoregulates the early operon EMBO J. 6 (10):3191-3199
- S70. Six EW, Sunshine MG, Williams J, Haggard-Ljungquist E, Lindqvist BH (1991) Morphopoietic switch mutations of bacteriophage P2 Virology 182 (1):34-46
- S71. Temple LM, Forsburg SL, Calendar R, Christie GE (1991) Nucleotide sequence of the genes encoding the major tail sheath and tail tube proteins of bacteriophage P2 Virology 181 (1):353-358
- S72. Yu A, Bertani LE, Haggard-Ljungquist E (1989) Control of prophage integration and excision in bacteriophage P2: nucleotide sequences of the int gene and att sites Gene 80 (1):11-sty
- S73. Ziermann R, Bartlett B, Calendar R, Christie GE (1994) Functions involved in bacteriophage P2-induced host cell lysis and identification of a new tail gene J. Bacteriol. 176 (16):4974-4984
- S74. Ziermann R, Calendar R (1990) Characterization of the cos sites of bacteriophages P2 and P4 Gene 96 (1):15-wrz
- S75. Halling C, Calendar R, Christie GE, Dale EC, Deho G, Finkel S, Flensburg J, Ghisotti D, Kahn ML, Lane KB, Lin CS, Lindqvist BH, Pierson LS, Six EW, Sunshine MG, Ziermann R (1990) DNA sequence of satellite bacteriophage P4 Nucleic Acids Res. 18 (6):1649
- S76. Van, Bokkelen GB, Dale EC, Halling C, Calendar R (1991) Mutational analysis of a bacteriophage P4 late promoter J. Bacteriol. 173 (1):37-45
- S77. Arbiol C, Comeau AM, Kutateladze M, Adamia R, Krisch HM (2010) Mobile regulatory cassettes mediate modular shuffling in t4-type phage genomes Genome Biol Evol 2010 140-152
- S78. Jamalludeen N, Kropinski AM, Johnson RP, Lingohr E, Harel J, Gyles CL (2008) Complete genomic sequence of bacteriophage phiEcoM-GJ1, a novel phage that has myovirus morphology and a podovirus-like RNA polymerase Appl. Environ. Microbiol. 74 (2):516-525
- S79. Reckenwald J, Schmidt H (2002) The nucleotide sequence of Shiga toxin (Stx) 2e-encoding phage phiP27 is not related to other Stx phage genomes, but the modular genetic structure is conserved Infect. Immun. 70 (4):1896-1908
- S80. Bullas LR, Mostaghimi AR, Arensdorf JJ, Rajadas PT, Zuccarelli AJ (1991) Salmonella phage PSP3, another member of the P2-like phage group Virology 185 (2):918-921
- S81. Julien B, Calendar R (1996) Bacteriophage PSP3 and phiR73 activator proteins: analysis of promoter specificities J. Bacteriol. 178 (19):5668-5675
- S82. Ang D, Keppel F, Klein G, Richardson A, Georgopoulos C (2000) Genetic analysis of bacteriophage-encoded cochaperonins Annu. Rev. Genet. 34 439-456
- S83. Ang D, Richardson A, Mayer MP, Keppel F, Krisch H, Georgopoulos C (2001) Pseudo-T-even bacteriophage RB49 encodes CocO, a cochaperonin for GroEL, which can substitute for Escherichia coli's GroES and Bacteriophage T4's Gp31 J. Biol. Chem. 276 (12):8720-8726
- S84. Desplats C, Dez C, Tetart F, Eleaume H, Krisch HM (2002) Snapshot of the genome of the pseudo-T-even bacteriophage RB49 J. Bacteriol. 184 (10):2789-2804
- S85. Desplats C, Krisch HM (2003) The diversity and evolution of the T4-type bacteriophages Res. Microbiol. 154 (4):259-267
- S86. Monod C, Repoila F, Kutateladze M, Tetart F, Krisch HM (1997) The genome of the pseudo T-even bacteriophages, a diverse group that resembles T4 J. Mol. Biol. 267 (2):237-249
- S87. Wang CC, Yeh LS, Karam JD (1995) Modular organization of T4 DNA polymerase. Evidence from phylogenetics J. Biol. Chem. 270 (44):26558-26564
- S88. Wang J, Sattar AK, Wang CC, Karam JD, Konigsberg WH, Steitz TA (1997) Crystal structure of a pol alpha family replication DNA polymerase from bacteriophage RB69 Cell 89 (7):1087-1099
- S89. Yeh LS, Hsu T, Karam JD (1998) Divergence of a DNA replication gene cluster in the T4-related bacteriophage RB69 J. Bacteriol. 180 (8):2005-2013
- S90. Allison GE, Angeles D, Tran-Dinh N, Verma NK (2002) Complete genomic sequence of SfV, a serotype-converting temperate bacteriophage of Shigella flexneri J. Bacteriol. 184 (7):1974-1987
- S91. Huan PT, Bastin DA, Whittle BL, Lindberg AA, Verma NK (1997) Molecular characterization of the genes involved in O-antigen modification, attachment, integration and excision in Shigella flexneri bacteriophage SfV Gene 195 (2):217-227
- S92. Huan PT, Whittle BL, Bastin DA, Lindberg AA, Verma NK (1997) Shigella flexneri type-specific antigen V: cloning, sequencing and characterization of the glucosyl transferase gene of temperate bacteriophage SfV Gene 195 (2):207-216
- S93. Arisaka F, Ishimoto L, Kassavetis G, Kumazaki T, Ishii S (1988) Nucleotide sequence of the tail tube structural gene of bacteriophage T4 J. Virol. 62 (3):882-886
- S94. Arisaka F, Nakako T, Takahashi H, Ishii S (1988) Nucleotide sequence of the tail sheath gene of bacteriophage T4 and amino acid sequence of its product J. Virol. 62 (4):1186-1193
- S95. Armstrong J, Brown RS, Tsugita A (1983) Primary structure and genetic organization of phage T4 DNA ligase Nucleic Acids Res. 11 (20):7145-7156
- S96. Belle A, Landthaler M, Shub DA (2002) Intronless homing: site-specific endonuclease SegF of bacteriophage T4 mediates localized marker exclusion analogous to homing endonucleases of group I introns Genes Dev. 16 (3):351-362
- S97. Bouet JY, Woszczyk J, Repoila F, Francois V, Louarn JM, Krisch HM (1994) Direct PCR sequencing of the nnd gene of bacteriophage T4: identification of a product involved in bacterial nucleoid disruption Gene 141 (1):16-wrz
- S98. Bova R, Cascino A, Cipollaro M, Gargano S, Grau O, Micheli MR, Santoro M, Scarlato V, Storlazzi A (1995) Bacteriophage T4 gene 28 DNA Seq. 5 (3):199-201
- S99. Bova R, Cascino A, Cipollaro M, Grau O, Micheli MR, Santoro M, Storlazzi A, Scarlato V, Gargano S (1990) Bacteriophage T4 gene 27 Nucleic Acids Res. 18 (10):3046
- S100. Broida J, Abelson J (1985) Sequence organization and control of transcription in the bacteriophage T4 tRNA region J. Mol. Biol. 185 (3):545-563
- S101. Carles-Kinch K, George JW, Kreuzer KN (1997) Bacteriophage T4 UvsW protein is a helicase involved in recombination, repair and the regulation of DNA replication origins EMBO J. 16 (13):4142-4151
- S102. Chu FK, Maley GF, Wang AM, Maley F (1987) Localization of the T4 phage ribonucleotide reductase B1 subunit gene and the nucleotide sequence of its upstream and 5' coding regions Gene 57 (1):143-148
- S103. Chu FK, Maley GF, West DK, Belfort M, Maley F (1986) Characterization of the intron in the phage T4 thymidylate synthase gene and evidence for its self-excision from the primary transcript Cell 45 (2):157-166
- S104. Daegelen P, Brody E (1990) The rIIA gene of bacteriophage T4. I. Its DNA sequence and discovery of a new open reading frame between genes 60 and rIIA Genetics 125 (2):237-248
- S105. Efimov VP, Prilipov AG, Mesyanzhinov VV (1990) Nucleotide sequences of bacteriophage T4 genes 6, 7 and 8 Nucleic Acids Res. 18 (17):5313
- S106. Franklin JL, Haseltine D, Davenport L, Mosig G (1998) The largest (70 kDa) product of the bacteriophage T4 DNA terminase gene 17 binds to single-stranded DNA segments and digests them towards junctions with double-stranded DNA J. Mol. Biol. 277 (3):541-557
- S107. Franklin JL, Mosig G (1996) Expression of the bacteriophage T4 DNA terminase genes 16 and 17 yields multiple proteins Gene 177 (1-2):179-189
- S108. Frazier MW, Mosig G (1990) The bacteriophage T4 gene mrh whose product inhibits late T4 gene expression in an Escherichia coli rpoH (sigma 32) mutant Gene 88 (1):14-lip
- S109. Fujisawa H, Yonesaki T, Minagawa T (1985) Sequence of the T4 recombination gene, uvsX, and its comparison with that of the recA gene of Escherichia coli Nucleic Acids Res. 13 (20):7473-7481
- S110. Gauss P, Gayle M, Winter RB, Gold L (1987) The bacteriophage T4 dexA gene: sequence and analysis of a gene conditionally required for DNA replication Mol. Gen. Genet. 206 (1):24-34
- S111. Gram H, Ruger W (1985) Genes 55, alpha gt, 47 and 46 of bacteriophage T4: the genomic organization as deduced by sequence analysis EMBO J. 4 (1):257-264
- S112. Gruidl ME, Chen TC, Gargano S, Storlazzi A, Cascino A, Mosig G (1991) Two bacteriophage T4 base plate genes (25 and 26) and the DNA repair gene uvsY belong to spatially and temporally overlapping transcription units Virology 184 (1):359-369
- S113. Hacker KJ, Alberts BM (1992) Overexpression, purification, sequence analysis, and characterization of the T4 bacteriophage dda DNA helicase J. Biol. Chem. 267 (29):20674-20681
- S114. Hahn S, Ruger W (1989) Organization of the bacteriophage T4 genome between map positions 150.745 and 145.824 Nucleic Acids Res. 17 (16):6729

## D. References (continued)

- S115. Hilse D, Koch T, Ruger W (1989) Nucleotide sequence of the alt gene of bacteriophage T4 *Nucleic Acids Res.* 17 (16):6731
- S116. Hinton DM (1989) Altered expression of the bacteriophage T4 gene 41 (primase-helicase) in an *Escherichia coli* rho mutant *J. Biol. Chem.* 264 (24):14440-14446
- S117. Ho CK, Shuman S (2002) Bacteriophage T4 RNA ligase 2 (gp24.1) exemplifies a family of RNA ligases found in all phylogenetic domains *Proc. Natl. Acad. Sci. U.S.A.* 99 (20):12709-12714
- S118. Hsu T, Wei RX, Dawson M, Karam JD (1987) Identification of two new bacteriophage T4 genes that may have roles in transcription and DNA replication *J. Virol.* 61 (2):366-374
- S119. Huang WM (1986) Nucleotide sequence of a type II DNA topoisomerase gene. Bacteriophage T4 gene 39 *Nucleic Acids Res.* 14 (19):7751-7765
- S120. Huang WM (1986) The 52-protein subunit of T4 DNA topoisomerase is homologous to the gyrA-protein of gyrase *Nucleic Acids Res.* 14 (18):7379-7390
- S121. Huang WM, Ao SZ, Casjens S, Orlandi R, Zeikus R, Weiss R, Winge D, Fang M (1988) A persistent untranslated sequence within bacteriophage T4 DNA topoisomerase gene 60 *Science* 239 (4843):1005-1012
- S122. Ishimoto LK, Ishimoto KS, Cascino A, Cipollaro M, Eiserling FA (1988) The structure of three bacteriophage T4 genes required for tail-tube assembly *Virology* 164 (1):81-90
- S123. Kadyrov FA, Shlyapnikov MG, Kryukov VM (1997) A phage T4 site-specific endonuclease, SegE, is responsible for a non-reciprocal genetic exchange between T-even-related phages *FEBS Lett.* 415 (1):75-80
- S124. Kai T, Selick HE, Yonesaki T (1996) Destabilization of bacteriophage T4 mRNAs by a mutation of gene 61.5 *Genetics* 144 (1):14-lip
- S125. Kaliman AV, Khasanova MA, Kryukov VM, Tanyashin VI, Bayev AA (1990) The nucleotide sequence of the region of bacteriophage T4 inh(lip)-hoc genes *Nucleic Acids Res.* 18 (14):4277
- S126. Keller B, Bickle TA (1986) The nucleotide sequence of gene 21 of bacteriophage T4 coding for the prohead protease *Gene* 49 (2):245-251
- S127. Keller B, Sengstag C, Kellenberger E, Bickle TA (1984) Gene 68, a new bacteriophage T4 gene which codes for the 17K prohead core protein is involved in head size determination *J. Mol. Biol.* 179 (3):415-430
- S128. Kim BC, Kim K, Park EH, Lim CJ (1997) Nucleotide sequence and revised map location of the arm gene from bacteriophage T4 *Mol. Cells* 7 (5):694-696
- S129. Koch T, Lamm N, Ruger W (1989) Sequencing, cloning and overexpression of genes of bacteriophage T4 between map positions 74.325 and 77.184 *Nucleic Acids Res.* 17 (11):4392
- S130. Koch T, Ruger W (1994) The ADP-ribosyltransferases (gpAlt) of bacteriophages T2, T4, and T6: sequencing of the genes and comparison of their products *Virology* 203 (2):294-298
- S131. Krisch HM, Allet B (1982) Nucleotide sequences involved in bacteriophage T4 gene 32 translational self-regulation *Proc. Natl. Acad. Sci. U.S.A.* 79 (16):4937-4941
- S132. Kutter E, Drivdahl R, Rand K (1984) Identification and characterization of the alc gene product of bacteriophage T4 *Genetics* 108 (2):291-304
- S133. Lamm N, Wang Y, Mathews CK, Ruger W (1988) Deoxycytidylate hydroxymethylase gene of bacteriophage T4. Nucleotide sequence determination and over-expression of the gene *Eur. J. Biochem.* 172 (3):553-563
- S134. Lu MJ, Henning U (1989) The immunity (imm) gene of *Escherichia coli* bacteriophage T4 *J. Virol.* 63 (8):3472-3478
- S135. Macdonald PM, Mosig G (1984) Regulation of a new bacteriophage T4 gene, 69, that spans an origin of DNA replication *EMBO J.* 3 (12):2863-2871
- S136. Maley GF, Ducean BW, Wang AM, Martinez J, Maley F (1990) Cloning, sequence analysis, and expression of the bacteriophage T4 cd gene *J. Biol. Chem.* 265 (1):47-51
- S137. Marusich EI, Mesyanzhinov VV (1989) Nucleotide and deduced amino acid sequences of bacteriophage T4 gene 20 *Nucleic Acids Res.* 17 (18):7514
- S138. Marusich EI, Mesyanzhinov VV (1989) Nucleotide and deduced amino acid sequences of bacteriophage T4 gene 22 *Nucleic Acids Res.* 17 (21):8865
- S139. Midgley CA, Murray NE (1985) T4 polynucleotide kinase; cloning of the gene (pseT) and amplification of its product *EMBO J.* 4 (10):2695-2703
- S140. Miller ES, Kutter E, Mosig G, Arisaka F, Kunisawa T, Ruger W (2003) Bacteriophage T4 genome *Microbiol. Mol. Biol. Rev.* 67 (1):86-156
- S141. Montag D, Degen M, Henning U (1987) Nucleotide sequence of gene t (lysis gene) of the *E. coli* phage T4 *Nucleic Acids Res.* 15 (16):6736
- S142. Montag D, Riede I, Eschbach ML, Degen M, Henning U (1987) Receptor-recognizing proteins of T-even type bacteriophages. Constant and hypervariable regions and an unusual case of evolution *J. Mol. Biol.* 196 (1):165-174
- S143. Mosig G, Colowick NE, Pietz BC (1998) Several new bacteriophage T4 genes, mapped by sequencing deletion endpoints between genes 56 (dCTPase) and dda (a DNA-dependent ATPase-helicase) modulate transcription *Gene* 223 (1-2):143-155
- S144. Mosig G, Lin GW, Franklin J, Fan WH (1989) Functional relationships and structural determinants of two bacteriophage T4 lysozymes: a soluble (gene e) and a baseplate-associated (gene 5) protein *New Biol.* 1 (2):171-179
- S145. Nivinskas R, Black LW (1988) Cloning, sequence, and expression of the temperature-dependent phage T4 capsid assembly gene 31 *Gene* 73 (1):251-257
- S146. Nivinskas R, Zajanckauskaite A, Raudonikiene A, Viteniene I (1992) The nucleotide sequence between genes 31 and 30 of bacteriophage T4 DNA *Seq. 2* (6):405-409
- S147. Oliver DB, Crowther RA (1981) DNA sequence of the tail fibre genes 36 and 37 of bacteriophage T4 *J. Mol. Biol.* 153 (3):545-568
- S148. Orsini G, Ouhammouch M, Le, Caer JP, Brody EN (1993) The asiA gene of bacteriophage T4 codes for the anti-sigma 70 protein *J. Bacteriol.* 175 (1):85-93
- S149. Owen JE, Schultz DW, Taylor A, Smith GR (1983) Nucleotide sequence of the lysozyme gene of bacteriophage T4. Analysis of mutations involving repeated sequences *J. Mol. Biol.* 165 (2):229-248
- S150. Paddison P, Abedon ST, Dressman HK, Gailbreath K, Tracy J, Mosser E, Neitzel J, Guttman B, Kutter E (1998) The roles of the bacteriophage T4 r genes in lysis inhibition and fine-structure genetics: a new perspective *Genetics* 148 (4):1539-1550
- S151. Parker ML, Christensen AC, Boosman A, Stockard J, Young ET, Doermann AH (1984) Nucleotide sequence of bacteriophage T4 gene 23 and the amino acid sequence of its product *J. Mol. Biol.* 180 (3):399-416
- S152. Penner M, Morad I, Snyder L, Kaufmann G (1995) Phage T4-coded Stp: double-edged effector of coupled DNA and tRNA-restriction systems *J. Mol. Biol.* 249 (5):857-868
- S153. Powell D, Franklin J, Arisaka F, Mosig G (1990) Bacteriophage T4 DNA packaging genes 16 and 17 *Nucleic Acids Res.* 18 (13):4005
- S154. Pribnow D, Sigurdson DC, Gold L, Singer BS, Napoli C, Brosius J, Dull TJ, Noller HF (1981) rII cistrons of bacteriophage T4. DNA sequence around the intercistronic divide and positions of genetic landmarks *J. Mol. Biol.* 149 (3):337-376
- S155. Prilipov AG, Selivanov NA, Efimov VP, Marusich EI, Mesyanzhinov VV (1989) Nucleotide sequences of bacteriophage T4 genes 9, 10 and 11 *Nucleic Acids Res.* 17 (8):3303
- S156. Prilipov AG, Selivanov NA, Nikolaeva LI, Mesyanzhinov VV (1988) Nucleotide and deduced amino acid sequence of bacteriophage T4 gene wac *Nucleic Acids Res.* 16 (21):10361
- S157. Purohit S, Mathews CK (1984) Nucleotide sequence reveals overlap between T4 phage genes encoding dihydrofolate reductase and thymidylate synthase *J. Biol. Chem.* 259 (10):6261-6266
- S158. Ramanculov E, Young R (2001) An ancient player unmasked: T4 rI encodes a t-specific antiholin *Mol. Microbiol.* 41 (3):575-583
- S159. Rand KN, Gait MJ (1984) Sequence and cloning of bacteriophage T4 gene 63 encoding RNA ligase and tail fibre attachment activities *EMBO J.* 3 (2):397-402
- S160. Raudonikiene A, Nivinskas R (1992) Gene rIII is the nearest downstream neighbour of bacteriophage T4 gene 31 *Gene* 114 (1):85-90
- S161. Sanson B, Uzan M (1992) Sequence and characterization of the bacteriophage T4 comC alpha gene product, a possible transcription antitermination factor *J. Bacteriol.* 174 (20):6539-6547
- S162. Scarlato V, Storlazzi A, Gargano S, Cascino A (1989) Bacteriophage T4 late gene expression: overlapping promoters direct divergent transcription of the base plate gene cluster *Virology* 171 (2):475-483
- S163. Selick HE, Stormo GD, Dyson RL, Alberts BM (1993) Analysis of five presumptive protein-coding sequences clustered between the primosome genes, 41 and 61, of bacteriophages T4, T2, and T6 *J. Virol.* 67 (4):2305-2316
- S164. Selivanov NA, Prilipov AG, Mesyanzhinov VV (1988) Nucleotide and deduced amino acid sequence of bacteriophage T4 gene 12 *Nucleic Acids Res.* 16 (5):2334
- S165. Selivanov NA, Prilipov AG, Mesyanzhinov VV (1989) Nucleotide sequences of bacteriophage T4 genes 13, 14 and 15 *Nucleic Acids Res.* 17 (9):3583
- S166. Sharma M, Ellis RL, Hinton DM (1992) Identification of a family of bacteriophage T4 genes encoding proteins similar to those present in group I introns of fungi and phage *Proc. Natl. Acad. Sci. U.S.A.* 89 (14):6658-6662
- S167. Shcherbakov V, Granovsky I, Plugina L, Shcherbakova T, Sizova S, Pyatkov K, Shlyapnikov M, Shubina O (2002) Focused genetic recombination of bacteriophage t4 initiated by double-strand breaks *Genetics* 162 (2):543-556
- S168. Sjoberg BM, Hahne S, Mathews CZ, Mathews CK, Rand KN, Gait MJ (1986) The bacteriophage T4 gene for the small subunit of ribonucleotide reductase contains an intron *EMBO J.* 5 (8):2031-2036
- S169. Spicer EK, Konigsberg WH (1983) Organization and Structure of Four T4 Genes Coding for DNA Replication Proteins in Mathews,C.K., Kutter,E.M., Mosig,G. and Berget,P.B. (Eds.); BACTERIOPHAGE T4: 291-301; American Society for Microbiology, Washington, DC
- S170. Spicer EK, Rush J, Fung C, Reha-Krantz LJ, Karam JD, Konigsberg WH (1988) Primary structure of T4 DNA polymerase. Evolutionary relatedness to eucaryotic and other procaryotic DNA polymerases *J. Biol. Chem.* 263 (16):7478-7486
- S171. Stehr M, Schneider G, Aslund F, Holmgren A, Lindqvist Y (2001) Structural basis for the thioredoxin-like activity profile of the glutaredoxin-like NrdH-redoxin from *Escherichia coli* *J. Biol. Chem.* 276 (38):35836-35841
- S172. Tomaschewski J, Gram H, Crabb JW, Ruger W (1985) T4-induced alpha- and beta-glucosyltransferase: cloning of the genes and a comparison of their products based on sequencing data *Nucleic Acids Res.* 13 (21):7551-7568
- S173. Tomaschewski J, Ruger W (1987) Nucleotide sequence and primary structures of gene products coded for by the T4 genome between map positions 48.266 kb and 39.166 kb *Nucleic Acids Res.* 15 (8):3632-3633
- S174. Trojanowska M, Miller ES, Karam J, Stormo G, Gold L (1984) The bacteriophage T4 regA gene: primary sequence of a translational repressor *Nucleic Acids Res.* 12 (15):5979-5993



## D. References (continued)

- S175. Truncaite L, Zajanckauskaite A, Nivinskas R (2002) Identification of two middle promoters upstream DNA ligase gene 30 of bacteriophage T4 J. Mol. Biol. 317 (2):179-190
- S176. Tseng MJ, Hilfinger JM, Walsh A, Greenberg GR (1988) Total sequence, flanking regions, and transcripts of bacteriophage T4 *nrda* gene, coding for alpha chain of ribonucleoside diphosphate reductase J. Biol. Chem. 263 (31):16242-16251
- S177. Uzan M, Brody E, Favre R (1990) Nucleotide sequence and control of transcription of the bacteriophage T4 *motA* regulatory gene Mol. Microbiol. 4 (9):1487-1496
- S178. Vaiskunaite R, Miller A, Davenport L, Mosig G (1999) Two new early bacteriophage T4 genes, *repEA* and *repEB*, that are important for DNA replication initiated from origin E J. Bacteriol. 181 (22):7115-7125
- S179. Valerie K, Stevens J, Lynch M, Henderson EE, de, Riel JK (1986) Nucleotide sequence and analysis of the 58.3 to 65.5-kb early region of bacteriophage T4 Nucleic Acids Res. 14 (21):8637-8654
- S180. Volker TA, Gafner J, Bickle TA, Showe MK (1982) Gene 67, a new, essential bacteriophage T4 head gene codes for a prehead core component, PIP. I. Genetic mapping and DNA sequence J. Mol. Biol. 161 (4):479-489
- S181. Wang FJ, Ripley LS (1998) The spectrum of acridine resistant mutants of bacteriophage T4 reveals cryptic effects of the *tsL141* DNA polymerase allele on spontaneous mutagenesis Genetics 148 (4):1655-1665
- S182. Xu W, Gauss P, Shen J, Dunn CA, Bessman MJ (2002) The gene *e.1* (*nudE.1*) of T4 bacteriophage designates a new member of the Nudix hydrolase superfamily active on flavin adenine dinucleotide, adenosine 5'-triphospho-5'-adenosine, and ADP-ribose J. Biol. Chem. 277 (26):23181-23185
- S183. Young P, Ohman M, Sjoberg BM (1994) Bacteriophage T4 gene 55.9 encodes an activity required for anaerobic ribonucleotide reduction J. Biol. Chem. 269 (45):27815-27818
- S184. Zajanckauskaite A, Malys N, Nivinskas R (1997) A rare type of overlapping genes in bacteriophage T4: gene 30.3' is completely embedded within gene 30.3 by one position downstream Gene 194 (2):157-162
- S185. Truncaite L, Simoliunas E, Zajanckauskaite A, Kaliniene L, Mankeviciute R, Staniulis J, Klausas V, Meskys R (2012) Bacteriophage *vB\_EcoM\_FV3*: a new member of 'rV5-like viruses' Arch. Virol. 157 (12):2431-2435
- S186. Kaliniene L, Klausas V, Truncaite L (2010) Low-temperature T4-like coliphages *vB\_EcoM-VR5*, *vB\_EcoM-VR7* and *vB\_EcoM-VR20* Arch. Virol. 155 (6):871-880
- S187. Kaliniene L, Klausas V, Zajanckauskaite A, Nivinskas R, Truncaite L (2011) Genome of low-temperature T4-related bacteriophage *vB\_EcoM-VR7* Arch. Virol. 156 (10):1913-1916
- S188. Simoliunas E, Kaliniene L, Truncaite L, Klausas V, Zajanckauskaite A, Meskys R (2012) Genome of *Klebsiella* sp.-infecting Bacteriophage *vB\_KleM\_RaK2* J. Virol. 86 (9):5406
- S189. Lehman SM, Kropinski AM, Castle AJ, Svircev AM (2009) Complete genome of the broad-host-range *Erwinia amylovora* phage *phiEa21-4* and its relationship to *Salmonella* phage *felix O1* Appl. Environ. Microbiol. 75 (7):2139-2147
- S190. Muller I, Kube M, Reinhardt R, Jelkmann W, Geider K (2011) Complete Genome Sequences of Three *Erwinia amylovora* Phages Isolated in North America and a Bacteriophage Induced from an *Erwinia tasmaniensis* Strain J. Bacteriol. 193 (3):795-796
- S191. Born Y, Fieseler L, Marazzi J, Lurz R, Duffy B, Loessner MJ (2011) Novel Virulent and Broad-Host-Range *Erwinia amylovora* Bacteriophages Reveal a High Degree of Mosaicism and a Relationship to Enterobacteriaceae Phages Appl. Environ. Microbiol. 77 (17):5945-5954
- S192. Kropinski AM, Lingohr EJ, Moyles DM, Chibeu A, Mazzocco A, Franklin K, Villegas A, Ahmed R, She YM, Johnson RP (2012) *Escherichia coli* O157:H7 Typing Phage V7 Is a T4-Like Virus J. Virol. 86 (18):10246
- S193. Villegas A, She YM, Kropinski AM, Lingohr EJ, Mazzocco A, Ojha S, Waddell TE, Ackermann HW, Moyles DM, Ahmed R, Johnson RP (2009) The genome and proteome of a virulent *Escherichia coli* O157:H7 bacteriophage closely resembling *Salmonella* phage *Felix O1* Virol. J. 6 41
- S194. Resch G, Kulik EM, Dietrich FS, Meyer J (2004) Complete genomic nucleotide sequence of the temperate bacteriophage *Aa Phi 23* of *Actinobacillus actinomycetemcomitans* J. Bacteriol. 186 (16):5523-5528
- S195. Benjamin RC, Fitzmaurice WP, Huang PC, Scocca JJ (1984) Nucleotide sequence of cloned DNA segments of the *Haemophilus influenzae* bacteriophage *HP1c1* Gene 31 (1-3):173-185
- S196. Esposito D, Fitzmaurice WP, Benjamin RC, Goodman SD, Waldman AS, Scocca JJ (1996) The complete nucleotide sequence of bacteriophage *HP1* DNA Nucleic Acids Res. 24 (12):2360-2368
- S197. Esposito D, Scocca JJ (1994) Identification of an *HP1* phage protein required for site-specific excision Mol. Microbiol. 13 (4):685-695
- S198. Fitzmaurice WP, Waldman AS, Benjamin RC, Huang PC, Scocca JJ (1984) Nucleotide sequence and properties of the cohesive DNA termini from bacteriophage *HP1c1* of *Haemophilus influenzae* Rd Gene 31 (1-3):197-203
- S199. Goodman SD, Scocca JJ (1989) Nucleotide sequence and expression of the gene for the site-specific integration protein from bacteriophage *HP1* of *Haemophilus influenzae* J. Bacteriol. 171 (8):4232-4240
- S200. Waldman AS, Goodman SD, Scocca JJ (1987) Nucleotide sequences and properties of the sites involved in lysogenic insertion of the bacteriophage *HP1c1* genome into the *Haemophilus influenzae* chromosome J. Bacteriol. 169 (1):238-246
- S201. Williams BJ, Golomb M, Phillips T, Brownlee J, Olson MV, Smith AL (2002) Bacteriophage *HP2* of *Haemophilus influenzae* J. Bacteriol. 184 (24):6893-6905
- S202. Zehr ES, Tabatabai LB (2011) Detection of a bacteriophage gene encoding a Mu-like portal protein in *Haemophilus parasuis* reference strains and field isolates by nested polymerase chain reaction J. Vet. Diagn. Invest. 23 (3):538-542
- S203. Zehr ES, Tabatabai LB, Bayles DO (2012) Genomic and proteomic characterization of *SuMu*, a Mu-like bacteriophage infecting *Haemophilus parasuis* BMC Genomics 13 331
- S204. Moberley JM, Authement RN, Segall AM, Paul JH (2008) The temperate marine phage *PhiHAP-1* of *Halomonas aquamarina* possesses a linear plasmid-like prophage genome J. Virol. 82 (13):6618-6630
- S205. Leblanc C, Caumont-Sarcos A, Comeau AM, Krisch HM (2009) Isolation and genomic characterization of the first phage infecting *Iodobacteria*: *phiPLPE*, a myovirus having a novel set of features Environ Microbiol Rep 1 (6):499-509
- S206. Alemayehu D, Ross RP, O'Sullivan O, Coffey A, Stanton C, Fitzgerald GF, McAuliffe O (2009) Genome of a virulent bacteriophage *Lb338-1* that lyses the probiotic *Lactobacillus paracasei* cheese strain Gene 448 (1):29-39
- S207. Highlander SK, Weissenberger S, Alvarez LE, Weinstock GM, Berget PB (2006) Complete nucleotide sequence of a P2 family lysogenic bacteriophage, *varphiMhaA1-PHL101*, from *Mannheimia haemolytica* serotype A1 Virology 350 (1):79-89
- S208. Yoshida T, Nagasaki K, Takashima Y, Shirai Y, Tomaru Y, Takao Y, Sakamoto S, Hiroishi S, Ogata H (2008) *Ma-LMM01* infecting toxic *Microcystis aeruginosa* illuminates diverse cyanophage genome strategies J. Bacteriol. 190 (5):1762-1772
- S209. Pedulla ML, Ford ME, Houtz JM, Karthikeyan T, Wadsworth C, Lewis JA, Jacobs-Sera D, Falbo J, Gross J, Pannunzio NR, Brucker W, Kumar V, Kandasamy J, Keenan L, Bardarov S, Kriakov J, Lawrence JG, Jacobs WR, Jr, Hendrix RW, Hatfull GF (2003) Origins of highly mosaic mycobacteriophage genomes Cell 113 (2):171-182
- S210. Hatfull GF, Pedulla ML, Jacobs-Sera D, Cichon PM, Foley A, Ford ME, Gonda RM, Houtz JM, Hryckowian AJ, Kelchner VA, Namburi S, Pajcini KV, Popovich MG, Schleicher DT, Simanek BZ, Smith AL, Zdanowicz GM, Kumar V, Peebles CL, Jacobs WR, Jr, Lawrence JG, Hendrix RW (2006) Exploring the mycobacteriophage metaproteome: phage genomics as an educational platform PLoS Genet. 2 (6):E92
- S211. Pope WH, Jacobs-Sera D, Russell DA, Peebles CL, Al-Atrache Z, Alcoser TA, Alexander LM, Alfano MB, Alford ST, Amy NE, Anderson MD, Anderson AG, Ang AA, Ares M, Jr, Barber AJ, Barker LP, Barrett JM, Barshop WD, Bauerle CM, Bayles IM, Belfield KL, Best AA, Borjon A, Jr, Bowman CA, Boyer CA, Bradley KW, Bradley VA, Broadway LN, Budwal K, Busby KN, Campbell IW, Campbell AM, Carey A, Caruso SM, Chew RD, Cockburn CL, Cohen LB, Corajod JM, Cresawn SG, Davis KR, Deng L, Denver DR, Dixon BR, Ekram S, Elgin SC, Engelsens AE, English BE, Erb ML, Estrada C, Filliger LZ, Findley AM, Forbes L, Forsyth MH, Fox TM, Fritz MJ, Garcia R, George ZD, Georges AE, Gissendanner CR, Goff S, Goldstein R, Gordon KC, Green RD, Guerra SL, Guiney-Olsen KR, Guiza BG, Haghghat L, Hagopian GV, Harmon CJ, Harmson JS, Hartzog GA, Harvey SE, He S, He KJ, Healy KE, Higinbotham ER, Hildebrandt EN, Ho JH, Hogan GM, Hohenstein VG, Holz NA, Huang VJ, Hufford EL, Hynes PM, Jackson AS, Jansen EC, Jarvik J, Jasinto PG, Jordan TC, Kasza T, Katelyn MA, Kelsey JS, Kerrigan LA, Khaw D, Kim J, Knutter JZ, Ko CC, Larkin GV, Laroche JR, Latif A, Leuba KD, Leuba SI, Lewis LO, Loesser-Casey KE, Long CA, Lopez AJ, Lowery N, Lu TQ, Mac V, Masters IR, McCloud JJ, McDonough MJ, Medenbach AJ, Menon A, Miller R, Morgan BK, Ng PC, Nguyen E, Nguyen KT, Nguyen ET, Nicholson KM, Parnell LA, Peirce CE, Perz AM, Peterson LJ, Pferdehirt RE, Philip SV, Pogliano K, Pogliano J, Polley T, Puopolo EJ, Rabinowitz HS, Resiss MJ, Rhyan CN, Robinson YM, Rodriguez LL, Rose AC, Rubin JD, Ruby JA, Saha MS, Sandoz JW, Savitskaya J, Schipper DJ, Schnitzler CE, Schott AR, Segal JB, Shaffer CD, Sheldon KE, Shepard EM, Shepardson JW, Shroff MK, Simmons JM, Simms EF, Simpson BM, Sinclair KM, Sjolholm RL, Slette IJ, Spaulding BC, Straub CL, Stukey J, Sughrue T, Tang TY, Tatyana LM, Taylor SB, Taylor BJ, Temple LM, Thompson JV, Tokarz MP, Trapani SE, Troum AP, Tsay J, Tubbs AT, Walton JM, Wang DH, Wang H, Warner JR, Weisser EG, Wendler SC, Weston-Hafer KA, Whelan HM, Williamson KE, Willis AN, Wirtshafter HS, Wong TW, Wu P, Yang Y, Yee BC, Zaidins DA, Zhang B, Zuniga MY, Hendrix RW, Hatfull GF (2011) Expanding the diversity of mycobacteriophages: insights into genome architecture and evolution PLoS ONE 6 (1):E16329
- S212. Baranyi U, Klein R, Lubitz W, Kruger DH, Witte A (2000) The archaeal halophilic virus-encoded Dam-like methyltransferase *M. phiCh1-I* methylates adenine residues and complements dam mutants in the low salt environment of *Escherichia coli* Mol. Microbiol. 35 (5):1168-1179
- S213. Klein R, Baranyi U, Rossler N, Greineder B, Scholz H, Witte A (2002) *Natrialba magadii* virus *phiCh1*: first complete nucleotide sequence and functional organization of a virus infecting a haloalkaliphilic archaeon Mol. Microbiol. 45 (3):851-863
- S214. Klein R, Greineder B, Baranyi U, Witte A (2000) The structural protein E of the archaeal virus *phiCh1*: evidence for processing in *Natrialba magadii* during virus maturation Virology 276 (2):376-387
- S215. Campoy S, Aranda J, Alvarez G, Barbe J, Llagostera M (2006) Isolation and sequencing of a temperate transducing phage for *Pasteurella multocida* Appl. Environ. Microbiol. 72 (5):3154-3160
- S216. Sullivan MB, Huang KH, Ignacio-Espinoza JC, Berlin AM, Kelly L, Weigele PR, DeFrancesco AS, Kern SE, Thompson LR, Young S, Yandava C, Fu R, Krastins B, Chase M, Sarracino D, Osborne MS, Henn MR, Chisholm SW (2010) Genomic analysis of oceanic cyanobacterial myoviruses compared with T4-like myoviruses from diverse hosts and environments Environ. Microbiol. 12 (11):3035-3056
- S217. Sullivan MB, Coleman ML, Weigele P, Rohwer F, Chisholm SW (2005) Three *Prochlorococcus* cyanophage genomes: signature features and ecological interpretations PLoS Biol. 3 (5):E144
- S218. Ceysens PJ, Miroshnikov K, Mattheus W, Krylov V, Robben J, Noben JP, Vanderschraeghe S, Sykiliinda N, Kropinski AM, Volckaert G, Mesyanzhinov V, Lavigne R (2009) Comparative analysis of the widespread and conserved PB1-like viruses infecting *Pseudomonas aeruginosa* Environ. Microbiol. 11 (11):2874-2883
- S219. Serwer P, Hayes SJ, Zaman S, Lieman K, Rolando M, Hardies SC (2004) Improved isolation of undersampled bacteriophages: finding of distant terminase genes Virology 329 (2):412-424
- S220. Thomas JA, Rolando MR, Carroll CA, Shen PS, Belnap DM, Weintraub ST, Serwer P, Hardies SC (2008) Characterization of *Pseudomonas chlororaphis* myovirus 201 $\varphi$ hi2-1 via genomic Ssequencing, mass spectrometry, and electron microscopy Virology 376 (2):330-338

## D. References (continued)

- S221. Burkal'tseva MV, Krylov VN, Pleteneva EA, Shaburova OV, Krylov SV, Volkart G, Sykilinda NN, Kurochkina LP, Mesianzhinov VV (2002) [Phenogenetic characterization of a group of giant Phi KZ-like bacteriophages of *Pseudomonas aeruginosa*] *Genetika* 38 (11):1470-1479
- S222. Hertveldt K, Lavigne R, Pleteneva E, Sernova N, Kurochkina L, Korchevskii R, Robben J, Mesyanzhinov V, Krylov VN, Volckaert G (2005) Genome comparison of *Pseudomonas aeruginosa* large phages *J. Mol. Biol.* 354 (3):536-545
- S223. Krylov V, Pleteneva E, Bourkaltseva M, Shaburova O, Volckaert G, Sykilinda N, Kurochkina L, Mesyanzhinov V (2003) Myoviridae bacteriophages of *Pseudomonas aeruginosa*: a long and complex evolutionary pathway *Res. Microbiol.* 154 (4):269-275
- S224. Lavigne R, Sun WD, Volckaert G (2004) PHIRE, a deterministic approach to reveal regulatory elements in bacteriophage genomes *Bioinformatics* 20 (5):629-635
- S225. Kwan T, Liu J, Dubow M, Gros P, Pelletier J (2006) Comparative Genomic Analysis of 18 *Pseudomonas aeruginosa* Bacteriophages *J. Bacteriol.* 188 (3):1184-1187
- S226. Garbe J, Bunk B, Rohde M, Schobert M (2011) Sequencing and Characterization of *Pseudomonas aeruginosa* phage JG004 *BMC Microbiol.* 11 (1):102
- S227. Garbe J, Wesche A, Bunk B, Kazmierczak M, Selezska K, Rohde C, Sikorski J, Rohde M, Jahn D, Schobert M (2010) Characterization of JG024, a *Pseudomonas aeruginosa* PB1- like broad host range phage under simulated infection conditions *BMC Microbiol.* 10 (1):301
- S228. Uchiyama J, Maeda Y, Takemura I, Chess-Williams R, Wakiguchi H, Matsuzaki S (2009) Blood kinetics of four intraperitoneally administered therapeutic candidate bacteriophages in healthy and neutropenic mice *Microbiol. Immunol.* 53 (5):301-304
- S229. Fukuda K, Ishida W, Uchiyama J, Rashel M, Kato S, Morita T, Muraoka A, Sumi T, Matsuzaki S, Daibata M, Fukushima A (2012) *Pseudomonas aeruginosa* Keratitis in Mice: Effects of Topical Bacteriophage KPP12 Administration *PLoS ONE* 7 (10)
230. Vanderschaeghe S (2008) Genome and proteome analysis of newly isolated *Pseudomonas aeruginosa* phages Thesis, Department of Biosystems, K.U.Leuven, Leuven, Belgium
231. Adriaenssens EM, Mattheus W, Cornelissen A, Shaburova O, Krylov VN, Kropinski AM, Lavigne R (2012) Complete genome sequence of the giant pseudomonas phage lu11 *J. Virol.* 86 (11):6369-6370
- S232. Alemayehu D, Casey PG, McAuliffe O, Guinane CM, Martin JG, Shanahan F, Coffey A, Ross RP, Hill C (2012) Bacteriophages PhiMR299-2 and PhiNH-4 Can Eliminate *Pseudomonas aeruginosa* in the Murine Lung and on Cystic Fibrosis Lung Airway Cells *MBio* 3 (2):E00029-12
- S233. Cornelissen A, Hardies SC, Shaburova OV, Krylov VN, Mattheus W, Kropinski AM, Lavigne R (2012) Complete Genome Sequence of the Giant Virus OBP and Comparative Genome Analysis of the Diverse phiKZ-Related Phages *J. Virol.* 86 (3):1844-1852
- S234. Debarbieux L, Leduc D, Maura D, Morello E, Criscuolo A, Grossi O, Balloy V, Touqui L (2010) Bacteriophages can treat and prevent *Pseudomonas aeruginosa* lung infections *J. Infect. Dis.* 201 (7):1096-1104
- S235. Hayashi T, Kamio Y, Hishinuma F, Usami Y, Titani K, Terawaki Y (1989) *Pseudomonas aeruginosa* cytotoxin: the nucleotide sequence of the gene and the mechanism of activation of the protoxin *Mol. Microbiol.* 3 (7):861-868
- S236. Hayashi T, Matsumoto H, Ohnishi M, Terawaki Y (1993) Molecular analysis of a cytotoxin-converting phage, phi CTX, of *Pseudomonas aeruginosa*: structure of the attP-cos-ctx region and integration into the serine tRNA gene *Mol. Microbiol.* 7 (5):657-667
- S237. Nakayama K, Kanaya S, Ohnishi M, Terawaki Y, Hayashi T (1999) The complete nucleotide sequence of phi CTX, a cytotoxin-converting phage of *Pseudomonas aeruginosa*: implications for phage evolution and horizontal gene transfer via bacteriophages *Mol. Microbiol.* 31 (2):399-419
- S238. Briers Y, Volckaert G, Cornelissen A, Lagaert S, Michiels CW, Hertveldt K, Lavigne R (2007) Muralytic activity and modular structure of the endolysins of *Pseudomonas aeruginosa* bacteriophages phiKZ and EL *Mol. Microbiol.* 65 (5):1334-1344
- S239. Mesyanzhinov VV, Robben J, Grymonprez B, Kostyuchenko VA, Bourkaltseva MV, Sykilinda NN, Krylov VN, Volckaert G (2002) The genome of bacteriophage phiKZ of *Pseudomonas aeruginosa* *J. Mol. Biol.* 317 (1):19-sty
- S240. Fujiwara A, Kawasaki T, Usami S, Fujie M, Yamada T (2008) Genomic characterization of *Ralstonia solanacearum* phage phiRSA1 and its related prophage (phiRSX) in strain GMI1000 *J. Bacteriol.* 190 (1):143-156
- S241. Yamada T, Satoh S, Ishikawa H, Fujiwara A, Kawasaki T, Fujie M, Ogata H (2010) A jumbo phage infecting the phytopathogen *Ralstonia solanacearum* defines a new lineage of the Myoviridae family *Virology* 398 (1):135-147
- S242. Hjorleifsdottir S, Hreggvidsson GO, Fridjonsson OH, Aevarsson A, Kristjansson JK (2000) Bacteriophage rm 378 of a thermophilic host organism Patent: WO 0075335-A 14-DEC-2000; Decode Genetics EHF. (IS)
- S243. McClelland M, Sanderson KE, Spieth J, Clifton SW, Latreille P, Courtney L, Porwollik S, Ali J, Dante M, Du F, Hou S, Layman D, Leonard S, Nguyen C, Scott K, Holmes A, Grewal N, Mulvaney E, Ryan E, Sun H, Florea L, Miller W, Stoneking T, Nhan M, Waterston R, Wilson RK (2001) Complete genome sequence of *Salmonella enterica* serovar Typhimurium LT2 *Nature* 413 (6858):852-856
- S244. Hooton SP, Timms AR, Rowsell J, Wilson R, Connerton IF (2011) *Salmonella* Typhimurium-specific bacteriophage PhiSH19 and the origins of species specificity in the Vi01-like phage family *Virol. J.* 8 (1):498
- S245. Santos SB, Kropinski AM, Ceysens PJ, Ackermann HW, Villegas A, Lavigne R, Krylov VN, Carvalho CM, Ferreira EC, Azeredo J (2011) Genomic and Proteomic Characterization of the Broad-Host-Range *Salmonella* Phage PVP-SE1: Creation of a New Phage Genus *J. Virol.* 85 (21):11265-11273
- S246. Hanna LF, Matthews TD, Dinsdale EA, Hasty D, Edwards RA (2012) Characterization of the ELPhiS Prophage from *Salmonella enterica* Serovar Enteritidis Strain LK5 *Appl. Environ. Microbiol.* 78 (6):1785-1793
- S247. Park M, Lee JH, Shin H, Kim M, Choi J, Kang DH, Heu S, Ryu S (2012) Characterization and Comparative Genomic Analysis of a Novel Bacteriophage, SFP10, Simultaneously Inhibiting both *Salmonella enterica* and *Escherichia coli* O157:H7 *Appl. Environ. Microbiol.* 78 (1):58-69
- S248. Pickard D, Toribio AL, Petty NK, van, Tonder A, Yu L, Goulding D, Barrell B, Rance R, Harris D, Wetter M, Wain J, Choudhary J, Thomson N, Dougan G (2010) A conserved acetyl esterase domain targets diverse bacteriophages to the Vi capsular receptor of *Salmonella enterica* serovar Typhi *J. Bacteriol.* 192 (21):5746-5754
- S249. Kim KH, Chang HW, Nam YD, Roh SW, Bae JW (2010) Phenotypic characterization and genomic analysis of the *Shigella sonnei* bacteriophage SP18 *J. Microbiol.* 48 (2):213-222
- S250. Diaz E, Lopez R, Garcia JL (1992) EJ-1, a temperate bacteriophage of *Streptococcus pneumoniae* with a Myoviridae morphotype *J. Bacteriol.* 174 (17):5516-5525
- S251. Romero P, Lopez R, Garcia E (2004) Genomic organization and molecular analysis of the inducible prophage EJ-1, a mosaic myovirus from an atypical pneumococcus *Virology* 322 (2):239-252
- S252. Dreher TW, Brown N, Bozarth CS, Schwartz AD, Riscoe E, Thrash C, Bennett SE, Tzeng SC, Maier CS (2011) A freshwater cyanophage whose genome indicates close relationships to photosynthetic marine cyanomyophages *Environ. Microbiol.* 13 (7):1858-1874
- S253. Mann NH, Clokie MR, Millard A, Cook A, Wilson WH, Wheatley PJ, Letarov A, Krisch HM (2005) The genome of S-PM2, a 'photosynthetic' T4-type bacteriophage that infects marine *Synechococcus* strains *J. Bacteriol.* 187 (9):3188-3200
- S254. Millard A, Clokie MR, Shub DA, Mann NH (2004) Genetic organization of the psbAD region in phages infecting marine *Synechococcus* strains *Proc. Natl. Acad. Sci. U.S.A.* 101 (30):11007-11012
- S255. Millard AD, Zwirgmaier K, Downey MJ, Mann NH, Scanlan DJ (2009) Comparative genomics of marine cyanomyoviruses reveals the widespread occurrence of *Synechococcus* host genes localized to a hyperplastic region: implications for mechanisms of cyanophage evolution *Environ. Microbiol.* 11 (9):2370-2387
- S256. Weigele PR, Pope WH, Pedulla ML, Houtz JM, Smith AL, Conway JF, King J, Hatfull GF, Lawrence JG, Hendrix RW (2007) Genomic and structural analysis of Syn9, a cyanophage infecting marine *Prochlorococcus* and *Synechococcus* *Environ. Microbiol.* 9 (7):1675-1695
- S257. Naryshkina T, Liu J, Florens L, Swanson SK, Pavlov AR, Pavlova NV, Inman R, Minakhin L, Kozyavkin SA, Washburn M, Mushegian A, Severinov K (2006) *Thermus thermophilus* bacteriophage phiYS40 genome and proteomic characterization of virions *J. Mol. Biol.* 364 (4):667-677
- S258. Tamakoshi M, Murakami A, Sugisawa M, Tsuneizumi K, Takeda S, Saheki T, Izumi T, Akiba T, Mitsuoka K, Toh H, Yamashita A, Arisaka F, Hattori M, Oshima T, Yamagishi A (2011) Genomic and proteomic characterization of the large Myoviridae bacteriophage varphiTMA of the extreme thermophile *Thermus thermophilus* Bacteriophage 1 (3):152-164
- S259. Seed KD, Bodi KL, Kropinski AM, Ackermann HW, Calderwood SB, Qadri F, Camilli A (2011) Evidence of a dominant lineage of *Vibrio cholerae*-specific lytic bacteriophages shed by cholera patients over a 10-year period in Dhaka, Bangladesh *MBio* 2 (1):E00334-E00310
- S260. Kapfhammer D, Blass J, Evers S, Reidl J (2002) *Vibrio cholerae* phage K139: complete genome sequence and comparative genomics of related phages *J. Bacteriol.* 184 (23):6592-6601
- S261. Nesper J, Blass J, Fountoulakis M, Reidl J (1999) Characterization of the major control region of *Vibrio cholerae* bacteriophage K139: immunity, exclusion, and integration *J. Bacteriol.* 181 (9):2902-2913
- S262. Reidl J, Mekalanos JJ (1995) Characterization of *Vibrio cholerae* bacteriophage K139 and use of a novel mini-transposon to identify a phage-encoded virulence factor *Mol. Microbiol.* 18 (4):685-701
- S263. Miller ES, Heidelberg JF, Eisen JA, Nelson WC, Durkin AS, Ciecko A, Feldblyum TV, White O, Paulsen IT, Nierman WC, Lee J, Szczypinski B, Fraser CM (2003) Complete genome sequence of the broad-host-range vibriophage KVP40: comparative genomics of a T4-related bacteriophage *J. Bacteriol.* 185 (17):5220-5233
- S264. Alanis, Villa A, Kropinski AM, Abbasifar R, Griffiths MW (2012) Complete Genome Sequence of *Vibrio parahaemolyticus* Bacteriophage vB\_VpaM\_MAR *J. Virol.* 86 (23):13138-13139
- S265. Alanis, Villa A, Kropinski AM, Abbasifar R, Abbasifar A, Griffiths MW (2012) Genome Sequence of Temperate *Vibrio parahaemolyticus* Bacteriophage vB\_VpaS\_MAR10 *J. Virol.* 86 (24):13851-13852
- S266. Oakey HJ, Cullen BR, Owens L (2002) The complete nucleotide sequence of the *Vibrio harveyi* bacteriophage VHML *J. Appl. Microbiol.* 93 (6):1089-1098
- S267. Lan SF, Huang CH, Chang CH, Liao WC, Lin IH, Jian WN, Wu YG, Chen SY, Wong HC (2009) Characterization of a new plasmid-like prophage in a pandemic *Vibrio parahaemolyticus* O3:K6 strain *Appl. Environ. Microbiol.* 75 (9):2659-2667
- S268. Inoue Y, Matsuura T, Ohara T, Azegami K (2006) Sequence analysis of the genome of OP2, a lytic bacteriophage of *Xanthomonas oryzae* pv. *oryzae* *J. Gen. Plant Pathol.* 72 104-110
- S269. Kiljunen S, Hakala K, Pinta E, Huttunen S, Pluta P, Gador A, Lonnberg H, Skurnik M (2005) Yersiniophage phiR1-37 is a tailed bacteriophage having a 270 kb DNA genome with thymidine replaced by deoxyuridine *Microbiology (Reading, Engl.)* 151 (PT 12), 4093-4102
