# Supplementary material for: The Discovery of phiAGATE, A Novel Phage Infecting Bacillus pumilus, Leads to New Insights into the Phylogeny of the Subfamily Spounavirinae
Source: PubMed Central journal article supplement (PMC3900605; doi:10.1371/journal.pone.0086632), 2014-01-23
Supplement: pone.0086632.s006.pdf [file pone.0086632.s006.pdf]

A. CDSs with predicted function

| gp# | Product name                                                            | Length | Strand | CDS coordinates | Accession  | Similar to                                                                                | Accession    | E Value   | InterPro domains                                                                                                                                                                                             | Ontological terms (GO IDs)                                                                                          | EC number   |
|-----|-------------------------------------------------------------------------|--------|--------|-----------------|------------|-------------------------------------------------------------------------------------------|--------------|-----------|--------------------------------------------------------------------------------------------------------------------------------------------------------------------------------------------------------------|---------------------------------------------------------------------------------------------------------------------|-------------|
| 002 | putative baseplate protein W                                            | 738    | -      | 86784←87521     | AGB62787.1 | putative baseplate protein [Bacillus phage BCP78]                                         | YP_006908029 | 7.81e-103 | G3DSA:3.10.450.40                                                                                                                                                                                            | 0019068, 0005507, 0048038, 0009308,                                                                                 | -           |
| 003 | putative baseplate J family protein                                     | 1047   | -      | 85724←86770     | AGB62786.1 | baseplate J family protein [Bacillus phage BCP78]                                         | YP_006908028 | 6.68e-166 | PF04865                                                                                                                                                                                                      | 0019068                                                                                                             | -           |
| 008 | putative intein containing helicase/endonuclease protein                | 3057   | -      | 76677←79733     | AGB62781.1 | ORF006 [Staphylococcus phage Twort]                                                       | YP_238583    | 0         | PF00271; SM00490; PS51194; PTHR24031; PTHR24031:SF128; G3DSA:3.40.50.300; PF04851; TIGR01443; PS50818; SM00305; G3DSA:2.170.16.10; G3DSA:3.10.28.10; PS50819; SSF55608; PR00379; PS50817; SSF51294; SSF52540 | 0006260, 0004386, 0003677, 0005524, 0004519, 0016539                                                                | -           |
| 010 | putative transcriptional regulator                                      | 1701   | -      | 74660←76360     | AGB62779.1 | putative transcriptional regulator [Bacillus phage BCP78]                                 | YP_006908022 | 0         | SM00419; PF13545; G3DSA:1.10.10.10; SSF46785                                                                                                                                                                 | 0006355, 0003700, 0005622                                                                                           | -           |
| 011 | putative helicase                                                       | 1473   | -      | 73145←74617     | AGB62778.1 | putative helicase 1 [Bacillus phage B4]                                                   | YP_006908462 | 0         | SM00382; PF03796; G3DSA:3.40.50.300; PS51199; SSF52540; PTHR13682                                                                                                                                            | 0006260, 0003678, 0005524, 0006260, 0005657                                                                         | -           |
| 012 | putative recombination exonuclease                                      | 1056   | -      | 72088←73143     | AGB62777.1 | putative nuclease SbcCD D subunit [Bacillus phage BCP78]                                  | YP_006908019 | 2.91e-113 | PF12850; G3DSA:3.60.21.10; PTHR30337; PTHR30337:SF0; SSF56300                                                                                                                                                | 0006310, 0004527, 0006259, 0016787, 0006260, 0006310                                                                | -           |
| 014 | putative recombination related exonuclease                              | 1905   | -      | 69842←71746     | AGB62775.1 | putative exonuclease [Bacillus phage BCP78]                                               | YP_006908018 | 0         | PF13558; PTHR32114; PTHR32114:SF0; G3DSA:1.10.287.510; PF13476; SSF52540; G3DSA:3.40.50.300                                                                                                                  | 0006310, 0005488, 0004518                                                                                           | -           |
| 016 | putative DNA primase                                                    | 1071   | -      | 68145←69215     | AGB62773.1 | putative DNA primase [Bacillus phage BCP78]                                               | YP_006908016 | 8.33e-125 | SSF56731; SM00400; PF01807; PTHR30313; PTHR30313:SF0; G3DSA:3.90.580.10; SSF57783                                                                                                                            | 0006260, 0003677, 0003887, 0006260, 0008408, 0042575                                                                | EC:2.7.7.7  |
| 017 | putative deoxyuridine 5'-triphosphate nucleotidohydrolase               | 618    | -      | 67456←68073     | AGB62772.1 | putative deoxyuridine 5'-triphosphate nucleotidohydrolase [Bacillus phage BCP78]          | YP_006908013 | 1.01e-55  | PTHR11241; PTHR11241:SF0; G3DSA:2.70.40.10; PF00692; SSF51283                                                                                                                                                | 0055086, 0046800, 0004170, 0006206                                                                                  | EC:3.6.1.23 |
| 020 | putative resolvase                                                      | 582    | -      | 66178←66759     | AGB62769.1 | hypothetical protein BCb4_0220 [Bacillus phage B4]                                        | YP_006908449 | 6.47e-55  | PD927567                                                                                                                                                                                                     | 0003676, 0090305, 0004518                                                                                           | -           |
| 031 | putative ribonucleotide reductase class Ib NrdI                         | 372    | -      | 62388←62759     | AGB62758.1 | ribonucleotide reductase stimulatory protein [Bacillus subtilis subsp. subtilis str. 168] | ZP_03591761  | 6.52e-45  | PF07972; TIGR00333; G3DSA:3.40.50.360; PIRSF005087; SSF52218                                                                                                                                                 | 0055086, 0005488, 0008152                                                                                           | -           |
| 032 | putative ribonucleotide reductase of class Ib (aerobic) subunit alpha 1 | 771    | -      | 61628←62398     | AGB62757.1 | bsu nrdEB intein containing protein [Bacillus sp. BT1B_CT2]                               | ZP_07999929  | 3.53e-151 | SSF51998; PF02867; G3DSA:3.20.70.20; PF00317; PF08343; SSF48168; PTHR11573; PTHR11573:SF4                                                                                                                    | 0055086, 0005971, 0006260, 0016539, 0004519, 0009265, 0005524, 0004748, 0055114, 0006144, 0006206, 0009186          | EC:1.17.4.1 |
| 033 | putative HNH endonuclease                                               | 528    | -      | 61058←61585     | AGB62756.1 | HNH endonuclease family protein [Bacillus amyloliquefaciens LL3]                          | YP_005546010 | 4.65e-62  | PF13392; SM00507; SSF54060                                                                                                                                                                                   | 0004518                                                                                                             | -           |
| 034 | putative ribonucleotide reductase of class Ib (aerobic) subunit alpha 2 | 1155   | -      | 59479←60633     | AGB62755.1 | ribonucleotide-diphosphate reductase subunit alpha [Bacillus sp. HYC-10]                  | ZP_11161285  | 0         | G3DSA:3.20.70.20; PS00089; PR01183; PF02867; TIGR02506; SSF51998; PTHR11573; PTHR11573:SF4                                                                                                                   | 0055086, 0005971, 0006260, 0016539, 0004519, 0009265, 0005524, 0004748, 0055114, 0006144, 0006206, 0009186          | EC:1.17.4.1 |
| 036 | putative ribonucleotide reductase of class Ib (aerobic) subunit beta    | 978    | -      | 58250←59227     | AGB62753.1 | hypothetical protein BSSC8_22480 [Bacillus subtilis subsp. subtilis str. SC-8]            | ZP_12671304  | 0         | PS00368; PF00268; G3DSA:1.10.620.20; PTHR23409; PTHR23409:SF12; TIGR04171; SSF47240; PIRSF000355                                                                                                             | 0055086, 0005971, 0006260, 0009265, 0046914, 0009186, 0004748, 0055114, 0006144, 0006206                            | EC:1.17.4.1 |
| 042 | putative metallo-dependent phosphatase 1                                | 588    | -      | 55575←56162     | AGB62747.1 | phosphoesterase [Lactobacillus fermentum IFO 3956]                                        | YP_001843367 | 7.09e-41  | G3DSA:3.60.21.10; SSF56300                                                                                                                                                                                   | 0016787                                                                                                             | -           |
| 045 | putative DNA-binding protein                                            | 309    | -      | 54024←54332     | AGB62744.1 | putative DNA-binding protein 3 [Bacillus phage B4]                                        | YP_006908437 | 2.68e-16  | -                                                                                                                                                                                                            | 0006310, 0003697, 0005524, 0006281, 0009432, 0008094                                                                | -           |
| 046 | putative DNA polymerase A.1                                             | 2652   | -      | 51284←53935     | AGB62743.1 | putative DNA polymerase 2 [Bacillus phage BCP78]                                          | YP_006907997 | 0         | G3DSA:1.10.150.20; SM00482; PR00868; G3DSA:3.30.70.370; PF00476; SSF56672; PF01612; SSF53098; G3DSA:3.30.420.10; PTHR10133; PTHR10133:SF20                                                                   | 0003677                                                                                                             | -           |
| 048 | truncated putative DNA polymerase A.2                                   | 669    | -      | 49604←50272     | AGB62741.1 | putative DNA polymerase 2 [Bacillus phage BCP78]                                          | YP_006907997 | 5e-98     | G3DSA:3.30.70.370; PR00868; PTHR10133; G3DSA:1.10.150.20; PF00476; SM00482; SSF56672                                                                                                                         | 0090116, 0003886, 0003677, 0090116, 0006555                                                                         | -           |
| 051 | putative DNA recombination and repair protein RecA                      | 1212   | -      | 46377←47588     | AGB62738.1 | recombination repair protein [Bacillus phage Bcp1]                                        | ACU27400     | 2.92e-157 | PS50163; PR00142; tmhm; PTHR22942:SF1; PTHR22942; PS50162; PF00154; G3DSA:3.40.50.300; SSF52540                                                                                                              | 0006260, 0003887, 0006260, 0003677, 0008408, 0042575                                                                | EC:2.7.7.7  |
| 054 | putative holin                                                          | 312    | -      | 44995←45306     | AGB62735.1 | putative holin protein [Bacillus phage BCP78]                                             | YP_006907987 | 3.74e-16  | PF04688; tmhm                                                                                                                                                                                                | -                                                                                                                   | -           |
| 058 | putative metallo-dependent phosphatase 2                                | 1341   | -      | 41630←42970     | AGB62731.1 | gp148 [Listeria phage A511]                                                               | YP_001468528 | 1.25e-119 | PF12850; SSF56300; G3DSA:3.60.21.10                                                                                                                                                                          | 0016787                                                                                                             | -           |
| 075 | putative RNA polymerase sigma factor SigF 1                             | 735    | -      | 32128←32862     | AGB62714.1 | sporulation sigma-G factor SigG [Thermacetogenium phaeum DSM 12270]                       | YP_006920306 | 4.38e-21  | PF04545; G3DSA:1.10.10.10; SSF88659; PF04542; TIGR02937; G3DSA:1.10.1740.10; SSF88946; PTHR30385; PTHR30385:SF0                                                                                              | 0006355, 0009987, 0003677, 0003700, 0016987                                                                         | -           |
| 076 | putative RNA polymerase sigma factor SigF 2                             | 681    | -      | 31381←32061     | AGB62713.1 | putative RNA polymerase sigma-B factor [Anaerococcus hydrogenalis ACS-025-V-Sch4]         | ZP_08169712  | 3.99e-15  | PF04545; G3DSA:1.10.10.10; SSF88659; PR00046; PTHR30385; PTHR30385:SF0; PF04542; TIGR02937; G3DSA:1.10.601.10; SSF88946                                                                                      | 0006355, 0003677, 0003700, 0016987                                                                                  | -           |
| 089 | putative peptidase M23                                                  | 549    | -      | 25348←25896     | AGB62700.1 | metalloendopeptidase-like membrane protein [Thermoanaerobacter tengcongensis MB4]         | NP_623660    | 2.77e-20  | PTHR21666; PTHR21666:SF7; PF01551; G3DSA:2.70.70.10; SSF51261                                                                                                                                                | 0016998, 0008933, 0016787, 0008152, 0016798, 0016020, 0000270, 0005576                                              | -           |
| 093 | putative DNA translocase                                                | 2229   | -      | 20992←23220     | AGB62696.1 | putative DNA translocase stage III sporulation protein [Bacillus phage BCP78]             | YP_006907935 | 0         | SM00382; PS50901; G3DSA:3.40.50.300; PF01580; SSF52540; PTHR22683; PTHR22683:SF1                                                                                                                             | 0006260, 0003677, 0003896, 0008270, 0005657, 0005730, 0006269, 0006351                                              | -           |
| 100 | putative XRE family transcriptional regulator                           | 231    | -      | 18309←18539     | AGB62689.1 | XRE family transcriptional regulator [Desulfotomaculum acetoxidans DSM 771]               | YP_003193213 | 1.40e-15  | PS50943; PF13443; SM00530; G3DSA:1.10.260.40; SSF47413                                                                                                                                                       | 0006355, 0043565                                                                                                    | -           |
| 108 | putative hexapeptide repeat containing transferase like protein         | 855    | -      | 12791←13645     | AGB62681.1 | Polymer-forming cytoskeletal [Haemophilus paraprohaemolyticus HK411]                      | ZP_10075299  | 2.99e-60  | G3DSA:2.160.10.10; SSF51161                                                                                                                                                                                  | 0016740                                                                                                             | -           |
| 139 | putative poly-gamma-glutamate hydrolase                                 | 675    | +      | 146087→146761   | AGB62650.1 | poly-gamma-glutamate hydrolase [Bacillus phage phiNIT1]                                   | BAC65290     | 4.36e-54  | PF05908                                                                                                                                                                                                      | 0046872, 0016787, 0016021, 0016020, 0005886                                                                         | -           |
| 140 | putative pectin lyase-like protein                                      | 1773   | +      | 144213→145985   | AGB62649.1 | hypothetical protein [Bacillus phage phiNIT1]                                             | BAI49175     | 0         | PF05048; SM00710; PF13229; SSF51126; G3DSA:2.160.20.10                                                                                                                                                       | 0016829                                                                                                             | -           |
| 150 | putative dihydrofolate reductase                                        | 486    | +      | 138583→139068   | AGB62639.1 | hypothetical protein [Bacillus phage phiNIT1]                                             | BAI49173     | 8.20e-56  | PR00070; PTHR11549; PF00186; PS51330; G3DSA:3.40.430.10; PIRSF000194; SSF53597                                                                                                                               | 0055086, 0004146, 0006545, 0009165, 0055114, 0050661, 0006761, 0046656                                              | EC:1.5.1.3  |
| 151 | putative adenylate kinase-like protein                                  | 636    | +      | 137933→138568   | AGB62638.1 | putative adenylate kinase-like protein [Bacillus phage BCP78]                             | YP_006907858 | 5.33e-48  | -                                                                                                                                                                                                            | 0016301, 0044237                                                                                                    | -           |
| 152 | putative thymidylate synthase                                           | 918    | +      | 136994→137911   | AGB62637.1 | hypothetical protein [Bacillus phage phiNIT1]                                             | BAI49171     | 3.65e-131 | PR00108; TIGR03284; PF00303; MF_00008; G3DSA:3.30.572.10; PTHR11549; SSF55831                                                                                                                                | 0055086, 0004799, 0006231                                                                                           | EC:2.1.1.45 |
| 153 | putative LIM-type zinc finger domain containing protein                 | 234    | +      | 136747→136980   | AGB62636.1 | hypothetical protein BCP78_0021 [Bacillus phage BCP78]                                    | YP_006907856 | 8.57e-19  | PS00478; G3DSA:2.10.110.10                                                                                                                                                                                   | 0008270                                                                                                             | -           |
| 155 | putative PcfJ protein                                                   | 1479   | +      | 134527→136005   | AGB62634.1 | hypothetical protein BCb4_0013 [Bacillus phage B4]                                        | YP_006908242 | 2.32e-106 | PF14284                                                                                                                                                                                                      | -                                                                                                                   | -           |
| 157 | putative PhoH family protein                                            | 729    | +      | 132710→133438   | AGB62632.1 | PhoH family protein [Bacillus phage B4]                                                   | YP_006908240 | 3.69e-104 | G3DSA:3.40.50.300; PTHR30473; PF02562; SSF52540                                                                                                                                                              | 0005524                                                                                                             | -           |
| 158 | putative N-acetylmuramoyl-L-alanine amidase                             | 936    | +      | 131586→132521   | AGB62631.1 | putative N-acetylmuramoyl-L-alanine amidase [Bacillus macauensis ZFHKF-1]                 | ZP_10322331  | 3.10e-59  | PF12200; G3DSA:3.40.80.10; PF01510; SM00644; SSF55846                                                                                                                                                        | 0000270, 0008745, 0009253, 0009252                                                                                  | EC:3.5.1.28 |
| 162 | putative terminase large subunit                                        | 1146   | +      | 128452→129597   | AGB62627.1 | large terminase [Bacillus phage 1102phi1-3]                                               | AAS45252     | 0         | PF05876                                                                                                                                                                                                      | 0019068                                                                                                             | -           |
| 163 | putative large terminase subunit-like protein 2                         | 306    | +      | 127788→128093   | AGB62626.1 | terminase large subunit [Bacillus phage BCP78]                                            | YP_006907847 | 1.46e-45  | -                                                                                                                                                                                                            | -                                                                                                                   | -           |
| 164 | putative large terminase subunit-like protein 1                         | 375    | +      | 127175→127549   | AGB62625.1 | putative terminase large subunit [Bacillus phage BCU4]                                    | AEW47511     | 2.29e-64  | -                                                                                                                                                                                                            | -                                                                                                                   | -           |
| 172 | putative lambda repressor-like DNA-binding protein                      | 321    | +      | 123993→124313   | AGB62617.1 | putative transcriptional regulator 3 [Bacillus phage B4]                                  | YP_006908501 | 9.22e-23  | PS50943; SM00530; G3DSA:1.10.260.40; PF12844; SSF47413                                                                                                                                                       | 0006355, 0043565                                                                                                    | -           |
| 178 | putative DNA-cytosine methyltransferase                                 | 123    | -      | 118749←118871   | AGB62611.1 | DNA-cytosine methyltransferase, partial [Pelosinus fermentans B3]                         | ZP_15523797  | 9.50e-13  | PF00145; SSF53335; G3DSA:3.40.50.150                                                                                                                                                                         | 0007049, 0003677, 0005524, 0007049, 0007059, 0016021, 0051301, 0017111                                              | EC:3.6.1.15 |
| 180 | putative portal protein                                                 | 1659   | -      | 116669←118327   | AGB62609.1 | putative portal protein [Bacillus phage BCP78]                                            | YP_006908060 | 0         | PF04860                                                                                                                                                                                                      | 0019068                                                                                                             | -           |
| 181 | putative prohead protease                                               | 792    | -      | 115761←116552   | AGB62608.1 | putative prohead protease [Bacillus phage BCP78]                                          | YP_006908058 | 4.52e-103 | PF04586                                                                                                                                                                                                      | 0019068, 0006508, 0008233                                                                                           | -           |
| 183 | putative major capsid protein                                           | 1425   | -      | 113243←114667   | AGB62606.1 | putative major capsid protein [Bacillus phage BCP78]                                      | YP_006908056 | 0         | tmhmm                                                                                                                                                                                                        | 0019068, 0033644, 0019012, 0016021, 0016020                                                                         | -           |
| 190 | putative tail sheath protein                                            | 1713   | -      | 107664←109376   | AGB62599.1 | putative tail sheath protein [Bacillus phage BCP78]                                       | YP_006908049 | 0         | PF04984                                                                                                                                                                                                      | 0019068, 0019012                                                                                                    | -           |
| 191 | putative structural protein                                             | 426    | -      | 107187←107612   | AGB62598.1 | hypothetical protein BCP78_0213 [Bacillus phage BCP78]                                    | YP_006908048 | 3.66e-88  | -                                                                                                                                                                                                            | 0019068, 0019012                                                                                                    | -           |
| 193 | putative cell wall-binding peptidase-related domain protein             | 609    | -      | 105851←106459   | AGB62596.1 | 3D domain protein [Bacillus phage B4]                                                     | YP_006908482 | 2.10e-53  | PF06725; G3DSA:2.40.40.10; PTHR21666; PTHR21666:SF27                                                                                                                                                         | 0000270, 0009254, 0004553, 0005576, 0005618, 0019867, 0016998                                                       | EC:3.2.1.0  |
| 197 | putative tail lysin 2                                                   | 3753   | -      | 100226←103978   | AGB62592.1 | putative endo-beta-N-acetylglucosaminidase [Bacillus phage Bastille]                      | YP_006907320 | 0         | tmhmm                                                                                                                                                                                                        | 0000270, 0016787                                                                                                    | -           |
| 198 | putative tail lysin 1                                                   | 2145   | -      | 97980←100124    | AGB62591.1 | putative tail lysin 1 [Bacillus phage BCU4]                                               | AEW47700     | 0         | PF00877; PTHR21666; PTHR21666:SF26; G3DSA:3.90.1720.10; SSF54001                                                                                                                                             | 0000270, 0009253, 0004040, 0004553, 0009254, 0019867, 0019064, 0019031, 0046789, 0016787, 0005618, 0007047, 0005576 | -           |
| 199 | putative tail fiber protein                                             | 2028   | -      | 95937←97964     | AGB62590.1 | putative tail fiber 2 [Bacillus phage BCU4]                                               | AEW47699     | 0         | PS50835                                                                                                                                                                                                      | 0019068, 0005515                                                                                                    | -           |
| 200 | putative minor structural protein 1                                     | 3756   | -      | 92168←95923     | AGB62589.1 | putative tail fiber 1 [Bacillus phage BCU4]                                               | AEW47696     | 0         | -                                                                                                                                                                                                            | 0019068, 0016798                                                                                                    | -           |
| 201 | putative minor structural protein 2                                     | 2403   | -      | 89686←92088     | AGB62588.1 | putative minor structural protein [Enterococcus phage phiEF24C]                           | YP_001504141 | 4.53e-91  | PF05895                                                                                                                                                                                                      | 0019068                                                                                                             | -           |

## B. CDSs with no predicted function similar to known sequences

| gp# | Product name         | Length | Strand | CDS coordinates | Accession  | Similar to                                                                           | Accession    | E Value   | InterPro domains | Ontological terms (GO IDs) | EC number |
|-----|----------------------|--------|--------|-----------------|------------|--------------------------------------------------------------------------------------|--------------|-----------|------------------|----------------------------|-----------|
| 001 | hypothetical protein | 504    | -      | 87521←88024     | AGB62788.1 | hypothetical protein BCP78_0195 [Bacillus phage BCP78]                               | YP_006908030 | 1.50e-51  | -                | n/a                        | n/a       |
| 004 | hypothetical protein | 1389   | -      | 84320←85708     | AGB62785.1 | gp35 [Listeria phage P100]                                                           | AAV53338     | 1.74e-84  | -                | n/a                        | n/a       |
| 005 | hypothetical protein | 531    | -      | 83685←84215     | AGB62784.1 | gp105 [Listeria phage A511]                                                          | YP_001468485 | 6.60e-54  | -                | n/a                        | n/a       |
| 006 | hypothetical protein | 3486   | -      | 80185←83670     | AGB62783.1 | putative adsorption associated tail protein [Bacillus phage BCP78]                   | YP_006908026 | 0         | -                | n/a                        | n/a       |
| 013 | hypothetical protein | 258    | -      | 71834←72091     | AGB62776.1 | hypothetical protein SpyM50665 [Streptococcus pyogenes str. Manfredo]                | YP_001128234 | 8.79e-17  | -                | n/a                        | n/a       |
| 030 | hypothetical protein | 549    | -      | 62901←63449     | AGB62759.1 | hypothetical protein BTF1_31497 [Bacillus thuringiensis HD-789]                      | YP_006613885 | 1e-36     | -                | n/a                        | n/a       |
| 038 | hypothetical protein | 591    | -      | 57046←57636     | AGB62751.1 | hypothetical protein YBT020_29026 [Bacillus thuringiensis serovar finitimus YBT-020] | YP_005563595 | 3.27e-57  | -                | n/a                        | n/a       |
| 039 | hypothetical protein | 237    | -      | 56820←57056     | AGB62750.1 | hypothetical protein PelgB_21842 [Paenibacillus elgii B69]                           | ZP_09077123  | 2.17e-21  | -                | n/a                        | n/a       |
| 040 | hypothetical protein | 264    | -      | 56463←56726     | AGB62749.1 | hypothetical protein IIK_05685 [Bacillus cereus VD102]                               | ZP_17584997  | 2.95e-12  | -                | n/a                        | n/a       |
| 041 | hypothetical protein | 276    | -      | 56172←56447     | AGB62748.1 | hypothetical protein IIK_05685 [Bacillus cereus VD102]                               | ZP_17584997  | 1.68e-13  | -                | n/a                        | n/a       |
| 044 | hypothetical protein | 756    | -      | 54316←55071     | AGB62745.1 | hypothetical protein BCP78_0165 [Bacillus phage BCP78]                               | YP_006908000 | 5.40e-133 | -                | n/a                        | n/a       |
| 047 | hypothetical protein | 531    | -      | 50673←51203     | AGB62742.1 | hypothetical protein [Staphylococcus phage SA11]                                     | YP_007005563 | 8.61e-22  | -                | n/a                        | n/a       |
| 049 | hypothetical protein | 486    | -      | 49020←49505     | AGB62740.1 | hypothetical protein BCP78_0161 [Bacillus phage BCP78]                               | YP_006907996 | 9.57e-53  | -                | n/a                        | n/a       |
| 050 | hypothetical protein | 1251   | -      | 47670←48920     | AGB62739.1 | hypothetical protein BCP78_0158 [Bacillus phage BCP78]                               | YP_006907993 | 8.63e-82  | -                | n/a                        | n/a       |
| 052 | hypothetical protein | 357    | -      | 45974←46330     | AGB62737.1 | hypothetical protein BCP78_0154 [Bacillus phage BCP78]                               | YP_006907989 | 1.02e-40  | -                | n/a                        | n/a       |
| 053 | hypothetical protein | 633    | -      | 45358←45990     | AGB62736.1 | putative RNA polymerase sigma factor [Bacillus phage B4]                             | YP_006908410 | 5.42e-78  | -                | n/a                        | n/a       |
| 055 | hypothetical protein | 366    | -      | 44610←44975     | AGB62734.1 | hypothetical protein BCP78_0151 [Bacillus phage BCP78]                               | YP_006907986 | 1.11e-11  | -                | n/a                        | n/a       |
| 056 | hypothetical protein | 948    | -      | 43314←44261     | AGB62733.1 | hypothetical protein BCP78_0150 [Bacillus phage BCP78]                               | YP_006907985 | 1.51e-89  | -                | n/a                        | n/a       |
| 062 | hypothetical protein | 615    | -      | 40358←40972     | AGB62727.1 | hypothetical protein BCP78_0134 [Bacillus phage BCP78]                               | YP_006907969 | 3.24e-49  | -                | n/a                        | n/a       |
| 067 | hypothetical protein | 723    | -      | 38188←38910     | AGB62722.1 | hypothetical protein BCP78_0126 [Bacillus phage BCP78]                               | YP_006907961 | 1.37e-119 | -                | n/a                        | n/a       |
| 068 | hypothetical protein | 555    | -      | 37529←38083     | AGB62721.1 | hypothetical protein BCP78_0125 [Bacillus phage BCP78]                               | YP_006907960 | 1.71e-44  | -                | n/a                        | n/a       |
| 069 | hypothetical protein | 531    | -      | 36891←37421     | AGB62720.1 | hypothetical protein BCP78_0124 [Bacillus phage BCP78]                               | YP_006907959 | 2.24e-49  | -                | n/a                        | n/a       |
| 070 | hypothetical protein | 855    | -      | 36037←36891     | AGB62719.1 | hypothetical protein BCP78_0122 [Bacillus phage BCP78]                               | YP_006907957 | 5.34e-28  | -                | n/a                        | n/a       |
| 071 | hypothetical protein | 669    | -      | 35272←35940     | AGB62718.1 | hypothetical protein BCP78_0118 [Bacillus phage BCP78]                               | YP_006907953 | 2.57e-11  | -                | n/a                        | n/a       |
| 073 | hypothetical protein | 636    | -      | 33787←34422     | AGB62716.1 | hypothetical protein BCP78_0112 [Bacillus phage BCP78]                               | YP_006907947 | 1.03e-21  | -                | n/a                        | n/a       |
| 074 | hypothetical protein | 432    | -      | 32989←33420     | AGB62715.1 | phage protein [Paenibacillus elgii B69]                                              | ZP_09077071  | 9.57e-18  | -                | n/a                        | n/a       |
| 087 | hypothetical protein | 1041   | -      | 26285←27325     | AGB62702.1 | Ig-like domain containing protein [Bacillus phage B4]                                | YP_006908362 | 4.90e-147 | SSF53067         | n/a                        | n/a       |
| 088 | hypothetical protein | 267    | -      | 26029←26295     | AGB62701.1 | hypothetical protein BCB4_0132 [Bacillus phage B4]                                   | YP_006908361 | 4.64e-12  | -                | n/a                        | n/a       |
| 090 | hypothetical protein | 549    | -      | 24464←25012     | AGB62699.1 | hypothetical protein BCP78_0102 [Bacillus phage BCP78]                               | YP_006907937 | 4.49e-22  | tmhmm            | n/a                        | n/a       |
| 092 | hypothetical protein | 1011   | -      | 23340←24350     | AGB62697.1 | hypothetical protein BCP78_0101 [Bacillus phage BCP78]                               | YP_006907936 | 1.63e-114 | tmhmm            | n/a                        | n/a       |
| 101 | hypothetical protein | 723    | -      | 17029←17751     | AGB62688.1 | hypothetical protein BCP78_0121 [Bacillus phage BCP78]                               | YP_006907956 | 3.64e-105 | -                | n/a                        | n/a       |
| 102 | hypothetical protein | 477    | -      | 16538←17014     | AGB62687.1 | hypothetical protein BCP78_0120 [Bacillus phage BCP78]                               | YP_006907955 | 1.36e-57  | -                | n/a                        | n/a       |
| 105 | hypothetical protein | 222    | -      | 15112←15333     | AGB62684.1 | hypothetical protein BCP78_0047 [Bacillus phage BCP78]                               | YP_006907882 | 1.35e-15  | -                | n/a                        | n/a       |
| 107 | hypothetical protein | 225    | -      | 13854←14078     | AGB62682.1 | hypothetical protein BAME_13800 [Bacillus sp. M 2-6]                                 | ZP_10162811  | 1.81e-20  | tmhmm            | n/a                        | n/a       |
| 109 | hypothetical protein | 201    | -      | 12476←12676     | AGB62680.1 | hypothetical protein EFP_gp176 [Enterococcus phage phiEF24C]                         | YP_001504285 | 1.87e-17  | -                | n/a                        | n/a       |
| 115 | hypothetical protein | 498    | -      | 9206←9703       | AGB62674.1 | hypothetical protein [Bacillus phage Bastille]                                       | YP_006907490 | 1.87e-23  | -                | n/a                        | n/a       |
| 132 | hypothetical protein | 270    | -      | 2800←3069       | AGB62657.1 | hypothetical protein GH15_013 [Staphylococcus phage GH15]                            | YP_007002136 | 1.62e-14  | -                | n/a                        | n/a       |
| 154 | hypothetical protein | 552    | +      | 136091→136642   | AGB62635.1 | gp128 [Bacillus phage G]                                                             | AEO93390     | 3.00e-50  | -                | n/a                        | n/a       |
| 160 | hypothetical protein | 690    | +      | 130506→131195   | AGB62629.1 | hypothetical protein [Bacillus phage Bastille]                                       | YP_006907554 | 3.54e-46  | tmhmm            | n/a                        | n/a       |
| 161 | hypothetical protein | 801    | +      | 129719→130519   | AGB62628.1 | gp75 [Listeria phage A511]                                                           | YP_001468455 | 1.74e-31  | -                | n/a                        | n/a       |
| 165 | hypothetical protein | 417    | +      | 126759→127175   | AGB62624.1 | hypothetical protein BCP78_0011 [Bacillus phage BCP78]                               | YP_006907846 | 1.03e-45  | -                | n/a                        | n/a       |
| 169 | hypothetical protein | 351    | -      | 124951←125301   | AGB62620.1 | hypothetical protein BCU4_0222 [Bacillus phage BCU4]                                 | AEW47728     | 7.57e-22  | -                | n/a                        | n/a       |
| 170 | hypothetical protein | 327    | -      | 124598←124924   | AGB62619.1 | hypothetical protein BCP78_0005 [Bacillus phage BCP78]                               | YP_006907840 | 1.82e-28  | tmhmm            | n/a                        | n/a       |
| 171 | hypothetical protein | 237    | -      | 124339←124575   | AGB62618.1 | hypothetical protein BCU4_0220 [Bacillus phage BCU4]                                 | AEW47726     | 1.08e-14  | -                | n/a                        | n/a       |
| 173 | hypothetical protein | 606    | +      | 123220→123825   | AGB62616.1 | hypothetical protein BCB4_0090 [Bacillus phage B4]                                   | YP_006908319 | 2e-25     | -                | n/a                        | n/a       |
| 176 | hypothetical protein | 522    | -      | 119810←120331   | AGB62613.1 | hypothetical protein HMPREF1012_01050 [Bacillus sp. BT1B_CT2]                        | ZP_08000016  | 1.98e-46  | -                | n/a                        | n/a       |
| 179 | hypothetical protein | 264    | -      | 118352←118615   | AGB62610.1 | hypothetical protein BCP78_0226 [Bacillus phage BCP78]                               | YP_006908061 | 2.95e-13  | -                | n/a                        | n/a       |
| 185 | hypothetical protein | 873    | -      | 112020←112892   | AGB62604.1 | hypothetical protein BCB4_0264 [Bacillus phage B4]                                   | YP_006908493 | 5.09e-145 | -                | n/a                        | n/a       |
| 186 | hypothetical protein | 846    | -      | 111161←112006   | AGB62603.1 | hypothetical protein BCB4_0263 [Bacillus phage B4]                                   | YP_006908492 | 7.16e-113 | -                | n/a                        | n/a       |
| 187 | hypothetical protein | 642    | -      | 110536←111177   | AGB62602.1 | hypothetical protein BCP78_0217 [Bacillus phage BCP78]                               | YP_006908052 | 8.62e-92  | -                | n/a                        | n/a       |
| 188 | hypothetical protein | 867    | -      | 109657←110523   | AGB62601.1 | hypothetical protein BCP78_0216 [Bacillus phage BCP78]                               | YP_006908051 | 5.12e-102 | -                | n/a                        | n/a       |
| 189 | hypothetical protein | 261    | -      | 109404←109664   | AGB62600.1 | hypothetical protein BCB4_0260 [Bacillus phage B4]                                   | YP_006908489 | 6.33e-17  | -                | n/a                        | n/a       |
| 195 | hypothetical protein | 408    | -      | 104666←105073   | AGB62594.1 | hypothetical protein BCB4_0251 [Bacillus phage B4]                                   | YP_006908480 | 1.25e-43  | -                | n/a                        | n/a       |
| 196 | hypothetical protein | 591    | -      | 104029←104619   | AGB62593.1 | hypothetical protein B55_0245 [Bacillus phage B55]                                   | AEW47479     | 1.61e-62  | -                | n/a                        | n/a       |
| 204 | hypothetical protein | 765    | -      | 88024←88788     | AGB62585.1 | hypothetical protein BCP78_0196 [Bacillus phage BCP78]                               | YP_006908031 | 5.64e-93  | -                | n/a                        | n/a       |

C. CDSs sharing no significant similarity to known sequences

| gp# | Product name         | Length | Strand | CDS coordinates                   | Accession                  | Similar to | Accession | E Value | InterPro domains          | Ontological terms (GO IDs) | EC number |
|-----|----------------------|--------|--------|-----------------------------------|----------------------------|------------|-----------|---------|---------------------------|----------------------------|-----------|
| 007 | hypothetical protein | 174    | -      | 79888 ← 80161                     | <a href="#">AGB62782.1</a> | -          | n/a       | n/a     | -                         | n/a                        | n/a       |
| 009 | hypothetical protein | 210    | -      | 76448 ← 76657                     | <a href="#">AGB62780.1</a> | -          | n/a       | n/a     | -                         | n/a                        | n/a       |
| 015 | hypothetical protein | 627    | -      | 69219 ← 69845                     | <a href="#">AGB62774.1</a> | -          | n/a       | n/a     | -                         | n/a                        | n/a       |
| 018 | hypothetical protein | 321    | -      | 67123 ← 67443                     | <a href="#">AGB62771.1</a> | -          | n/a       | n/a     | -                         | n/a                        | n/a       |
| 019 | hypothetical protein | 366    | -      | 66756 ← 67121                     | <a href="#">AGB62770.1</a> | -          | n/a       | n/a     | -                         | n/a                        | n/a       |
| 021 | hypothetical protein | 147    | -      | 65963 ← 66109                     | <a href="#">AGB62768.1</a> | -          | n/a       | n/a     | -                         | n/a                        | n/a       |
| 022 | hypothetical protein | 159    | -      | 65800 ← 65958                     | <a href="#">AGB62767.1</a> | -          | n/a       | n/a     | -                         | n/a                        | n/a       |
| 023 | hypothetical protein | 273    | -      | 65537 ← 65809                     | <a href="#">AGB62766.1</a> | -          | n/a       | n/a     | -                         | n/a                        | n/a       |
| 024 | hypothetical protein | 258    | -      | 65290 ← 65547                     | <a href="#">AGB62765.1</a> | -          | n/a       | n/a     | -                         | n/a                        | n/a       |
| 025 | hypothetical protein | 348    | -      | 64604 ← 64951                     | <a href="#">AGB62764.1</a> | -          | n/a       | n/a     | -                         | n/a                        | n/a       |
| 026 | hypothetical protein | 174    | -      | 64378 ← 64551                     | <a href="#">AGB62763.1</a> | -          | n/a       | n/a     | -                         | n/a                        | n/a       |
| 027 | hypothetical protein | 315    | -      | 64062 ← 64376                     | <a href="#">AGB62762.1</a> | -          | n/a       | n/a     | -                         | n/a                        | n/a       |
| 028 | hypothetical protein | 312    | -      | 63749 ← 64060                     | <a href="#">AGB62761.1</a> | -          | n/a       | n/a     | -                         | n/a                        | n/a       |
| 029 | hypothetical protein | 288    | -      | 63462 ← 63749                     | <a href="#">AGB62760.1</a> | -          | n/a       | n/a     | -                         | n/a                        | n/a       |
| 035 | hypothetical protein | 168    | -      | 59227 ← 59394                     | <a href="#">AGB62754.1</a> | -          | n/a       | n/a     | -                         | n/a                        | n/a       |
| 037 | hypothetical protein | 447    | -      | 57720 ← 58166                     | <a href="#">AGB62752.1</a> | -          | n/a       | n/a     | -                         | n/a                        | n/a       |
| 043 | hypothetical protein | 381    | -      | 55178 ← 55558                     | <a href="#">AGB62746.1</a> | -          | n/a       | n/a     | -                         | n/a                        | n/a       |
| 057 | hypothetical protein | 282    | -      | 42989 ← 43270                     | <a href="#">AGB62732.1</a> | -          | n/a       | n/a     | -                         | n/a                        | n/a       |
| 059 | hypothetical protein | 381    | -      | 41209 ← 41589                     | <a href="#">AGB62730.1</a> | -          | n/a       | n/a     | -                         | n/a                        | n/a       |
| 060 | hypothetical protein | 447    | -      | 41209 ← 41655                     | <a href="#">AGB62729.1</a> | -          | n/a       | n/a     | -                         | n/a                        | n/a       |
| 061 | hypothetical protein | 132    | -      | 40973 ← 41104                     | <a href="#">AGB62728.1</a> | -          | n/a       | n/a     | -                         | n/a                        | n/a       |
| 063 | hypothetical protein | 162    | -      | 40184 ← 40345                     | <a href="#">AGB62726.1</a> | -          | n/a       | n/a     | -                         | n/a                        | n/a       |
| 064 | hypothetical protein | 312    | -      | 39858 ← 40169                     | <a href="#">AGB62725.1</a> | -          | n/a       | n/a     | -                         | n/a                        | n/a       |
| 065 | hypothetical protein | 447    | -      | 39415 ← 39861                     | <a href="#">AGB62724.1</a> | -          | n/a       | n/a     | -                         | n/a                        | n/a       |
| 066 | hypothetical protein | 420    | -      | 39009 ← 39428                     | <a href="#">AGB62723.1</a> | -          | n/a       | n/a     | -                         | n/a                        | n/a       |
| 072 | hypothetical protein | 678    | -      | 34533 ← 35210                     | <a href="#">AGB62717.1</a> | -          | n/a       | n/a     | -                         | n/a                        | n/a       |
| 077 | hypothetical protein | 276    | -      | 31125 ← 31400                     | <a href="#">AGB62712.1</a> | -          | n/a       | n/a     | -                         | n/a                        | n/a       |
| 078 | hypothetical protein | 264    | -      | 30513 ← 30776                     | <a href="#">AGB62711.1</a> | -          | n/a       | n/a     | -                         | n/a                        | n/a       |
| 079 | hypothetical protein | 384    | -      | 30091 ← 30474                     | <a href="#">AGB62710.1</a> | -          | n/a       | n/a     | -                         | n/a                        | n/a       |
| 080 | hypothetical protein | 402    | -      | 29690 ← 30091                     | <a href="#">AGB62709.1</a> | -          | n/a       | n/a     | -                         | n/a                        | n/a       |
| 081 | hypothetical protein | 186    | -      | 29255 ← 29440                     | <a href="#">AGB62708.1</a> | -          | n/a       | n/a     | -                         | n/a                        | n/a       |
| 082 | hypothetical protein | 252    | -      | 28977 ← 29228                     | <a href="#">AGB62707.1</a> | -          | n/a       | n/a     | -                         | n/a                        | n/a       |
| 083 | hypothetical protein | 153    | -      | 28824 ← 28976                     | <a href="#">AGB62706.1</a> | -          | n/a       | n/a     | <a href="#">P551257</a>   | n/a                        | n/a       |
| 084 | hypothetical protein | 273    | -      | 28532 ← 28804                     | <a href="#">AGB62705.1</a> | -          | n/a       | n/a     | -                         | n/a                        | n/a       |
| 085 | hypothetical protein | 441    | -      | 27872 ← 28312                     | <a href="#">AGB62704.1</a> | -          | n/a       | n/a     | -                         | n/a                        | n/a       |
| 086 | hypothetical protein | 402    | -      | 27478 ← 27879                     | <a href="#">AGB62703.1</a> | -          | n/a       | n/a     | -                         | n/a                        | n/a       |
| 091 | hypothetical protein | 126    | +      | 24373 → 24498                     | <a href="#">AGB62698.1</a> | -          | n/a       | n/a     | -                         | n/a                        | n/a       |
| 094 | hypothetical protein | 249    | -      | 20653 ← 20901                     | <a href="#">AGB62695.1</a> | -          | n/a       | n/a     | -                         | n/a                        | n/a       |
| 095 | hypothetical protein | 207    | -      | 20414 ← 20620                     | <a href="#">AGB62694.1</a> | -          | n/a       | n/a     | -                         | n/a                        | n/a       |
| 096 | hypothetical protein | 198    | -      | 20200 ← 20397                     | <a href="#">AGB62693.1</a> | -          | n/a       | n/a     | -                         | n/a                        | n/a       |
| 097 | hypothetical protein | 279    | -      | 19883 ← 20161                     | <a href="#">AGB62692.1</a> | -          | n/a       | n/a     | -                         | n/a                        | n/a       |
| 098 | hypothetical protein | 1032   | -      | 18850 ← 19881                     | <a href="#">AGB62691.1</a> | -          | n/a       | n/a     | -                         | n/a                        | n/a       |
| 099 | hypothetical protein | 330    | -      | 18560 ← 18889                     | <a href="#">AGB62690.1</a> | -          | n/a       | n/a     | -                         | n/a                        | n/a       |
| 103 | hypothetical protein | 327    | -      | 15971 ← 16297                     | <a href="#">AGB62686.1</a> | -          | n/a       | n/a     | -                         | n/a                        | n/a       |
| 104 | hypothetical protein | 477    | -      | 15399 ← 15875                     | <a href="#">AGB62685.1</a> | -          | n/a       | n/a     | -                         | n/a                        | n/a       |
| 106 | hypothetical protein | 843    | -      | 14133 ← 14975                     | <a href="#">AGB62683.1</a> | -          | n/a       | n/a     | -                         | n/a                        | n/a       |
| 110 | hypothetical protein | 396    | -      | 11921 ← 12316                     | <a href="#">AGB62679.1</a> | -          | n/a       | n/a     | -                         | n/a                        | n/a       |
| 111 | hypothetical protein | 378    | -      | 11541 ← 11918                     | <a href="#">AGB62678.1</a> | -          | n/a       | n/a     | -                         | n/a                        | n/a       |
| 112 | hypothetical protein | 183    | -      | 10717 ← 10899                     | <a href="#">AGB62677.1</a> | -          | n/a       | n/a     | -                         | n/a                        | n/a       |
| 113 | hypothetical protein | 330    | -      | 10289 ← 10618                     | <a href="#">AGB62676.1</a> | -          | n/a       | n/a     | -                         | n/a                        | n/a       |
| 114 | hypothetical protein | 303    | -      | 9977 ← 10279                      | <a href="#">AGB62675.1</a> | -          | n/a       | n/a     | -                         | n/a                        | n/a       |
| 116 | hypothetical protein | 153    | -      | 8727 ← 8879                       | <a href="#">AGB62673.1</a> | -          | n/a       | n/a     | <a href="#">P551257</a>   | n/a                        | n/a       |
| 117 | hypothetical protein | 249    | -      | 8458 ← 8706                       | <a href="#">AGB62672.1</a> | -          | n/a       | n/a     | -                         | n/a                        | n/a       |
| 118 | hypothetical protein | 573    | -      | 7788 ← 8360                       | <a href="#">AGB62671.1</a> | -          | n/a       | n/a     | -                         | n/a                        | n/a       |
| 119 | hypothetical protein | 126    | -      | 7586 ← 7711                       | <a href="#">AGB62670.1</a> | -          | n/a       | n/a     | -                         | n/a                        | n/a       |
| 120 | hypothetical protein | 552    | -      | 6971 ← 7522                       | <a href="#">AGB62669.1</a> | -          | n/a       | n/a     | -                         | n/a                        | n/a       |
| 121 | hypothetical protein | 303    | -      | 6391 ← 6693                       | <a href="#">AGB62668.1</a> | -          | n/a       | n/a     | -                         | n/a                        | n/a       |
| 122 | hypothetical protein | 222    | -      | 6088 ← 6309                       | <a href="#">AGB62667.1</a> | -          | n/a       | n/a     | -                         | n/a                        | n/a       |
| 123 | hypothetical protein | 213    | -      | 5732 ← 5944                       | <a href="#">AGB62666.1</a> | -          | n/a       | n/a     | -                         | n/a                        | n/a       |
| 124 | hypothetical protein | 306    | -      | 5413 ← 5718                       | <a href="#">AGB62665.1</a> | -          | n/a       | n/a     | -                         | n/a                        | n/a       |
| 125 | hypothetical protein | 405    | -      | 5007 ← 5411                       | <a href="#">AGB62664.1</a> | -          | n/a       | n/a     | -                         | n/a                        | n/a       |
| 126 | hypothetical protein | 243    | -      | 4687 ← 4929                       | <a href="#">AGB62663.1</a> | -          | n/a       | n/a     | -                         | n/a                        | n/a       |
| 127 | hypothetical protein | 282    | -      | 4687 ← 4968                       | <a href="#">AGB62662.1</a> | -          | n/a       | n/a     | -                         | n/a                        | n/a       |
| 128 | hypothetical protein | 327    | -      | 4331 ← 4657                       | <a href="#">AGB62661.1</a> | -          | n/a       | n/a     | -                         | n/a                        | n/a       |
| 129 | hypothetical protein | 438    | -      | 3855 ← 4292                       | <a href="#">AGB62660.1</a> | -          | n/a       | n/a     | -                         | n/a                        | n/a       |
| 130 | hypothetical protein | 219    | -      | 3606 ← 3824                       | <a href="#">AGB62659.1</a> | -          | n/a       | n/a     | -                         | n/a                        | n/a       |
| 131 | hypothetical protein | 414    | -      | 3146 ← 3559                       | <a href="#">AGB62658.1</a> | -          | n/a       | n/a     | -                         | n/a                        | n/a       |
| 133 | hypothetical protein | 381    | -      | 1952 ← 2332,<br>(149127 ← 149507) | <a href="#">AGB62656.1</a> | -          | n/a       | n/a     | -                         | n/a                        | n/a       |
| 134 | hypothetical protein | 210    | -      | 1728 ← 1937,<br>(148903 ← 149112) | <a href="#">AGB62655.1</a> | -          | n/a       | n/a     | -                         | n/a                        | n/a       |
| 135 | hypothetical protein | 396    | -      | 1166 ← 1561,<br>(148341 ← 148736) | <a href="#">AHB12550.1</a> | -          | n/a       | n/a     | -                         | n/a                        | n/a       |
| 136 | hypothetical protein | 291    | -      | 785 ← 1075,<br>(147960 ← 148250)  | <a href="#">AHB12549.1</a> | -          | n/a       | n/a     | -                         | n/a                        | n/a       |
| 137 | hypothetical protein | 240    | -      | 553 ← 792,<br>(147728 ← 147967)   | <a href="#">AGB62652.1</a> | -          | n/a       | n/a     | -                         | n/a                        | n/a       |
| 138 | hypothetical protein | 345    | -      | 118 ← 462,<br>(147293 ← 147637)   | <a href="#">AHB12548.1</a> | -          | n/a       | n/a     | -                         | n/a                        | n/a       |
| 141 | hypothetical protein | 537    | +      | 143475 → 144011                   | <a href="#">AGB62648.1</a> | -          | n/a       | n/a     | -                         | n/a                        | n/a       |
| 142 | hypothetical protein | 276    | +      | 143187 → 143462                   | <a href="#">AGB62647.1</a> | -          | n/a       | n/a     | -                         | n/a                        | n/a       |
| 143 | hypothetical protein | 465    | +      | 142733 → 143197                   | <a href="#">AGB62646.1</a> | -          | n/a       | n/a     | -                         | n/a                        | n/a       |
| 144 | hypothetical protein | 477    | +      | 142267 → 142743                   | <a href="#">AGB62645.1</a> | -          | n/a       | n/a     | -                         | n/a                        | n/a       |
| 145 | hypothetical protein | 576    | +      | 141702 → 142277                   | <a href="#">AGB62644.1</a> | -          | n/a       | n/a     | -                         | n/a                        | n/a       |
| 146 | hypothetical protein | 207    | +      | 141494 → 141700                   | <a href="#">AGB62643.1</a> | -          | n/a       | n/a     | <a href="#">TIGR03831</a> | n/a                        | n/a       |
| 147 | hypothetical protein | 675    | +      | 140716 → 141390                   | <a href="#">AGB62642.1</a> | -          | n/a       | n/a     | -                         | n/a                        | n/a       |
| 148 | hypothetical protein | 411    | +      | 140202 → 140612                   | <a href="#">AGB62641.1</a> | -          | n/a       | n/a     | -                         | n/a                        | n/a       |
| 149 | hypothetical protein | 798    | +      | 139085 → 139882                   | <a href="#">AGB62640.1</a> | -          | n/a       | n/a     | <a href="#">PF12227</a>   | n/a                        | n/a       |
| 156 | hypothetical protein | 1005   | +      | 133428 → 134432                   | <a href="#">AGB62633.1</a> | -          | n/a       | n/a     | -                         | n/a                        | n/a       |
| 159 | hypothetical protein | 336    | +      | 131188 → 131523                   | <a href="#">AGB62630.1</a> | -          | n/a       | n/a     | -                         | n/a                        | n/a       |
| 166 | hypothetical protein | 516    | +      | 125973 → 126488                   | <a href="#">AGB62623.1</a> | -          | n/a       | n/a     | -                         | n/a                        | n/a       |
| 167 | hypothetical protein | 273    | +      | 125689 → 125961                   | <a href="#">AGB62622.1</a> | -          | n/a       | n/a     | -                         | n/a                        | n/a       |
| 168 | hypothetical protein | 291    | -      | 125291 ← 125581                   | <a href="#">AGB62621.1</a> | -          | n/a       | n/a     | -                         | n/a                        | n/a       |
| 174 | hypothetical protein | 333    | -      | 121502 ← 121834                   | <a href="#">AGB62615.1</a> | -          | n/a       | n/a     | -                         | n/a                        | n/a       |
| 175 | hypothetical protein | 297    | -      | 120404 ← 120700                   | <a href="#">AGB62614.1</a> | -          | n/a       | n/a     | -                         | n/a                        | n/a       |
| 177 | hypothetical protein | 375    | -      | 118890 ← 119264                   | <a href="#">AGB62612.1</a> | -          | n/a       | n/a     | -                         | n/a                        | n/a       |
| 182 | hypothetical protein | 960    | -      | 114797 ← 115756                   | <a href="#">AGB62607.1</a> | -          | n/a       | n/a     | -                         | n/a                        | n/a       |
| 184 | hypothetical protein | 246    | -      | 112916 ← 113161                   | <a href="#">AGB62605.1</a> | -          | n/a       | n/a     | -                         | n/a                        | n/a       |
| 192 | hypothetical protein | 363    | -      | 106684 ← 107046                   | <a href="#">AGB62597.1</a> | -          | n/a       | n/a     | -                         | n/a                        | n/a       |
| 194 | hypothetical protein | 585    | -      | 105156 ← 105740                   | <a href="#">AGB62595.1</a> | -          | n/a       | n/a     | -                         | n/a                        | n/a       |
| 202 | hypothetical protein | 453    | -      | 89205 ← 89657                     | <a href="#">AGB62587.1</a> | -          | n/a       | n/a     | -                         | n/a                        | n/a       |
| 203 | hypothetical protein | 282    | -      | 88877 ← 89158                     | <a href="#">AGB62586.1</a> | -          | n/a       | n/a     | -                         | n/a                        | n/a       |
